# Supplementary material for: A Comparison of Transcriptional Diversity of Swine Macrophages Infected With TgHB1 Strain of Toxoplasma gondii Isolated in China
Source: Front Cell Infect Microbiol. 2020 Sep 25;10:526876. doi: 10.3389/fcimb.2020.526876 (PMC7546811; doi:10.3389/fcimb.2020.526876)
Supplement: Supplementary file 2 [file Table_2.XLSX]

## Sheet: Sheet1
Table S2 The number of pig macrophage genes by different FPKM expression level intervals
Group	Time point	Biological repetition	0~1	1~3	3~15	15~60	>60	Total number of gene with FPKM >1
NC	0h	1	16063	2820	5718	4619	1660	14817
		2	15841	2940	5858	4573	1668	15039
		3	15426	3059	5967	4756	1672	15454
Macrophage-RH	6h	1	16758	2553	5579	4187	1803	14122
		2	16829	2578	5476	4174	1823	14051
		4	16150	2706	5701	4565	1758	14730
	12h	1	16419	2736	5559	4303	1863	14461
		2	16577	2716	5481	4272	1834	14303
		4	16407	2648	5511	4517	1797	14473
	24h	1	15976	3066	5980	4252	1606	14904
		2	15881	3042	5981	4271	1705	14999
		4	16562	2703	5542	4297	1776	14318
Macrophage-HB1	6h	1	16722	2581	5552	4166	1859	14158
		2	17015	2660	5398	3958	1849	13865
		4	16174	2732	5686	4501	1787	14706
	12h	1	16471	2762	5618	4227	1802	14409
		2	16500	2702	5621	4219	1838	14380
		4	16602	2674	5466	4314	1824	14278
	24h	1	15970	3035	5936	4276	1663	14910
		2	16114	2937	5895	4212	1722	14766
		4	16498	2768	5585	4256	1773	14382
Macrophage-ME49	6h	1	16618	2656	5560	4203	1843	14262
		2	16984	2641	5500	3935	1820	13896
		4	16376	2637	5634	4374	1859	14504
	12h	1	16559	2703	5443	4298	1877	14321
		2	16777	2651	5434	4157	1861	14103
		4	16768	2695	5421	4091	1905	14112
	24h	1	16036	2911	5977	4241	1715	14844
		2	16236	2895	5853	4150	1746	14644
		4	16568	2707	5610	4213	1782	14312
