# Supplementary material for: A Comparison of Transcriptional Diversity of Swine Macrophages Infected With TgHB1 Strain of Toxoplasma gondii Isolated in China
Source: Front Cell Infect Microbiol. 2020 Sep 25;10:526876. doi: 10.3389/fcimb.2020.526876 (PMC7546811; doi:10.3389/fcimb.2020.526876)
Supplement: Supplementary file 4 [file Table_4.XLSX]

## Sheet: sheet1
Table S4. The signal peptide, TM Domains and proteins location of TgHB1 unique differentially expressed genes
Gene ID	Product Description	Molecular Weight (kDa)	Up or Down	SignalP Peptide	# TM Domains	Protein location prediction
TGME49_202760	hypothetical protein	38.625	Down	null	0	19S proteasome, outlier
TGME49_245500	dipeptidyl peptidase iv (dpp iv) n-terminal region domain-containing protein	205.657	Up	null	0	19S proteasome, cytosol
TGME49_321680	hypothetical protein	40.66	Up	null	0	19S proteasome, cytosol
TGME49_214830	hypothetical protein	163.971	Up	null	0	19S proteasome, outlier
TGME49_225470	peptide methionine sulfoxide reductase	30.383	Down	null	0	19S proteasome, outlier
TGME49_230070	BolA family protein	9.981	Up	null	0	19S proteasome, outlier
TGME49_304520	hypothetical protein	110.591	Down	null	0	19S proteasome, outlier
TGME49_309290	hypothetical protein	33.682	Down	null	0	19S proteasome, outlier
TGME49_231140	ribosomal protein RPS25	18.681	Up	null	0	40S ribosome
TGME49_232710	ribosomal protein RPS3A	29.371	Up	null	0	40S ribosome
TGME49_263700	ribosomal protein RPS14	16.301	Up	null	0	40S ribosome
TGME49_204020	ribosomal protein RPL8	28.254	Up	null	0	60S ribosome
TGME49_227600	ribosomal protein RPL34	15.383	Up	null	0	60S ribosome
TGME49_228470	ribosomal protein RPL15	24.325	Up	null	0	60S ribosome
TGME49_238010	ribosomal protein RPL23A	18.561	Up	null	0	60S ribosome
TGME49_238250	ribosomal protein RPL36	11.407	Up	null	0	60S ribosome
TGME49_245680	ribosomal protein RPL21	17.893	Up	null	0	60S ribosome
TGME49_284560	ribosomal protein RPL9	21.424	Up	null	0	60S ribosome
TGME49_288720	ribosomal protein RPL10	24.8	Up	null	0	60S ribosome
TGME49_292130	ribosomal protein RPL13A	32.749	Up	null	0	60S ribosome
TGME49_300190	ribosomal protein RPL37A	10.404	Up	null	0	60S ribosome
TGME49_313390	ribosomal protein RPL6	31.221	Up	HMM: MSGNCQATLGFLPIASHSRAK, NN: MSGNCQATLGFLPIASHSRAKVCFCVDCGTAADVFFFPAPLRAL	0	60S ribosome
TGME49_201760	hypothetical protein	37.305	Down	null	0	apical 1
TGME49_204880	hypothetical protein	96.132	Down	HMM: MSCFAPGALCGCCCELCRPVRCV, NN: MSCFAPGALCGCCCELCRPVRCV	0	apical 1
TGME49_214880	hypothetical protein	98.373	Down	null	0	apical 1
TGME49_222350	hypothetical protein	47.881	Down	null	0	apical 1
TGME49_225020	hypothetical protein	114.399	Down	null	0	apical 1
TGME49_235380	hypothetical protein	65.183	Down	null	0	apical 1
TGME49_245640	hypothetical protein	46.534	Down	HMM: MNQSTIVATSVVAPQSAVSLSR, NN: MNQSTIVATSVVAPQSAVSL	0	apical 1
TGME49_246950	hypothetical protein	48.565	Down	null	0	apical 1
TGME49_253600	hypothetical protein	97.397	Down	null	0	apical 1
TGME49_256030	hypothetical protein	29.222	Down	null	0	apical 1
TGME49_260820	IMC sub-compartment protein ISP1	19.413	Down	null	0	apical 1
TGME49_260825	hypothetical protein	10.25	Down	null	0	apical 1
TGME49_266630	hypothetical protein	67.319	Down	null	0	apical 1
TGME49_267370	kinesin motor domain-containing protein	256.866	Down	null	0	apical 1
TGME49_275670	alveolin domain containing intermediate filament IMC15	77.224	Down	null	0	apical 1
TGME49_278780	hypothetical protein	45.869	Down	null	0	apical 1
TGME49_301420	hypothetical protein	29.493	Down	null	0	apical 1
TGME49_226040	EF hand domain-containing protein	18.983	Down	null	0	apical 2
TGME49_246930	calmodulin CAM1	19.049	Down	null	0	apical 2
TGME49_262010	calmodulin CAM2	15.407	Down	null	0	apical 2
TGME49_278450	hypothetical protein	50.998	Down	null	0	apical 2, outlier
TGME49_204350	hypothetical protein	148.06	Up	HMM: MWTPALLLFASLCFSFLDFLAAS, NN: MWTPALLLFASLCFSFLDFLAAS	0	apicoplast
TGME49_207630	peptidyl-tRNA hydrolase domain-containing protein	54.961	Up	HMM: MGRLSLSSFCLLRTSCFFALRELRAAASALLAASAG, NN: MGRLSLSSFCLLRTSCFFALRELRAA	0	apicoplast
TGME49_208560	carrier superfamily protein	72.367	Up	null	1	apicoplast
TGME49_208820	1-deoxy-D-xylulose-5-phosphate synthase	154.376	Up	null	0	apicoplast
TGME49_213240	hypothetical protein	82.625	Up	null	1	apicoplast
TGME49_216630	trigger factor protein, putative	113.304	Up	HMM: MGKLAIRGYPAPLHVLKRNCAFVFVSFSLFASLPLECS, NN: MGKLAIRGYPAPLHVLKRNCAFVFVSFSLFAS	0	apicoplast
TGME49_220350	tRNA ligases class II (D, K and N) domain-containing protein	127.445	Up	HMM: MSPSYSRSRQINYCSKVSHRKMYRLLSPLFSTSLVLLASLLWPPACAGL, NN: MSPSYSRSRQINYCSKVSHRKMYRLLSPLFSTSLVLLASLLWPPACAGL	1	apicoplast
TGME49_228270	hypothetical protein	66.293	Up	null	0	apicoplast
TGME49_233500	triose-phosphate isomerase TPI-II	39.559	Up	HMM: MSGSASSVHFCAPPQSPFLLTLFISALCLAPSFFARPSNAFHLAAGSAA, NN: MSGSASSVHFCAPPQSPFLLTLFISALCLAPSFFARPSNAF	0	apicoplast
TGME49_233838	PET112 family, C terminal region domain-containing protein	113.834	Up	HMM: MRPPGACHRFLLLFASLNFLLFFASDLLLSPSGSPAFVSCA, NN: MRPPGACHRFLLLFASLNFLLFFASDLLLS	1	apicoplast
TGME49_249820	ATP-binding cassette sub-family B member 5	150.832	Up	null	0	apicoplast
TGME49_251590	hypothetical protein	88.003	Up	HMM: MEDDPPNSTVFALPSLPLSSSSPLSASVSSRWKTLPLLALLSLFSSVPLSAGALSL, NN: MEDDPPNSTVFALPSLPLSSSSPLSASVSSRWKTLPLLALLSLFSSVPLSAGAL	0	apicoplast
TGME49_254110	tryptophanyl-tRNA synthetase (TrpRS1)	90.362	Up	HMM: MHVRGRLCPCFCSSAGVLRLAVCLVIVVSFIDIASQA, NN: MHVRGRLCPCFCSSAGVLRLAVCLVIVVSFIDIASQAK	1	apicoplast
TGME49_256840	hypothetical protein	82.787	Up	null	0	apicoplast
TGME49_257980	ribosome recycling factor protein	52.051	Up	HMM: MKVTSLPPRSVFLALSFLLVLSLIVRPQ, NN: MKVTSLPPRSVFLALSFLLVLSLIVRPQ	2	apicoplast
TGME49_259190	hypothetical protein	108.194	Up	null	0	apicoplast
TGME49_267690	hypothetical protein	211.584	Up	HMM: MALISASDLPARLMPGRAVCQSLLYSLPRLSLSSGQ, NN: MALISASDLPARLMPGRAVCQSLLYSLPRLSLSS	6	apicoplast
TGME49_268690	hypothetical protein	63.72	Up	null	1	apicoplast
TGME49_285830	hypothetical protein	360.654	Up	null	2	apicoplast
TGME49_292360	hypothetical protein	117.448	Up	null	1	apicoplast
TGME49_298990	ferredoxin NADP+ oxidoreductase FNR	54.136	Down	HMM: MVRGIRPRVYFAFVAVVASVAISVQEVVSF, NN: MVRGIRPRVYFAFVAVVASVAISV	1	apicoplast
TGME49_259950	carbonate dehydratase, eukaryotic-type domain-containing protein	95.165	Down	null	0	apicoplast, outlier
TGME49_290730	CS domain-containing protein	41.9	Up	HMM: MESLPASVRLLCPPLLSSAS, NN: MESLPASVRLLCPPLLSSAS	0	apicoplast, outlier
TGME49_201380	chorismate synthase, putative	58.103	Down	null	0	cytosol
TGME49_205510	nucleolar protein 5, putative	54.348	Up	null	0	cytosol
TGME49_205558	NAC domain-containing protein	20.506	Up	null	0	cytosol
TGME49_205710	lysine-tRNA ligase	74.394	Up	HMM: MRSPCSGGKSLFEALSLVFCWRPRVWPR, NN: MRSPCSGGKSLFEALSLVFCWRPRVWPR	0	cytosol
TGME49_207640	isoleucyl-tRNA synthetase family protein	141.53	Up	null	0	cytosol
TGME49_209030	actin ACT1	41.907	Down	null	0	cytosol
TGME49_209290	ribosomal protein RPS28	13.214	Up	HMM: MPFGALFPVSSRFSHTFAPRICVFSFLSHSPSSRLVWGC, NN: MPFGALFPVSSRFSHTFAP	0	cytosol
TGME49_209600	hypothetical protein	50.2	Down	null	0	cytosol
TGME49_209870	HAD hydrolase, family IIA protein	95.119	Down	null	0	cytosol
TGME49_214760	erythronate-4-phosphate dehydrogenase domain-containing protein	42.223	Down	HMM: MHSRKAPLATMARETPPPSLTLVVLLAAEVPLD, NN: MHSRKAPLATMARETPPPSLTLVVLLAAEVPLDTP	0	cytosol
TGME49_214780	hydrolase, NUDIX family protein	25.261	Up	HMM: MLRRHIGCFLIPLVELHHLVCSR, NN: MLRRHIGCFLIPLVELHHLVCSR	0	cytosol
TGME49_215260	carbamoylphosphate synthetase	187.035	Up	null	0	cytosol
TGME49_219190	nuclear movement protein domain containing protein	30.098	Down	null	0	cytosol
TGME49_222840	Ser/Thr phosphatase family protein	48.157	Down	HMM: MLRVAEYIAILLRWPRFGVLGA, NN: MLRVAEYIAILLRWPRFGVLGA	0	cytosol
TGME49_222850	stress responsive a/b barrel domain-containing protein	11.922	Down	null	0	cytosol
TGME49_229180	HEAT repeat-containing protein	136.163	Up	null	0	cytosol
TGME49_231600	HEAT repeat-containing protein	128.089	Up	null	0	cytosol
TGME49_231920	oxidoreductase, short chain dehydrogenase/reductase family protein	33.734	Up	null	0	cytosol
TGME49_236580	Prp31-15.5k-U4 Snrna Complex family protein	19.947	Up	HMM: MCRLSTGSPLTLSVGIWFLLACRWISKSLGC, NN: MCRLSTGSPLTLSVGIWFLLACRWISKSLGC	0	cytosol
TGME49_239310	ribulose 5-phosphate isomerase	27.483	Up	null	0	cytosol
TGME49_241840	hypothetical protein	49.143	Down	null	0	cytosol
TGME49_242000	DUF51 family protein	29.748	Up	null	0	cytosol
TGME49_242730	guanylate kinase family protein	43.293	Down	null	0	cytosol
TGME49_243910	Cof family hydrolase subfamily protein	40.718	Up	null	0	cytosol
TGME49_244150	glycerate kinase	38.876	Up	null	0	cytosol
TGME49_253070	hydrolase, TatD family protein	71.534	Up	null	0	cytosol
TGME49_253570	hypothetical protein	35.703	Down	HMM: MAAPRGLPISAATLMEGVCRAA, NN: MAAPRGLPISAATLMEGVCRAA	0	cytosol
TGME49_259660	orotate phosphoribosyltransferase	31.592	Up	null	0	cytosol
TGME49_264050	ubiquitin-conjugating enzyme subfamily protein	34.371	Down	null	0	cytosol
TGME49_265150	hypothetical protein	52.648	Up	null	0	cytosol
TGME49_280600	histidyl-tRNA synthetase (HisRS), putative	134.874	Up	null	0	cytosol
TGME49_288210	PUL domain-containing protein	98.166	Up	null	0	cytosol
TGME49_288380	heat shock protein HSP90	81.932	Up	null	0	cytosol
TGME49_290260	thioredoxin family Trp26 protein	23.128	Down	null	0	cytosol
TGME49_305040	HEAT repeat-containing protein	125.97	Up	null	0	cytosol
TGME49_311890	hypothetical protein	44.136	Down	null	0	cytosol
TGME49_314070	hypothetical protein	22.811	Down	null	0	cytosol
TGME49_318310	transketolase	76.906	Up	null	0	cytosol
TGME49_318750	deoxyribose-phosphate aldolase	30.89	Up	null	0	cytosol
TGME49_286220	GDP-L-fucose synthetase	48.523	Up	null	0	cytosol, 19S proteasome
TGME49_315250	GAMM1 protein, putative	67.115	Up	null	0	cytosol, 19S proteasome
TGME49_233680	nuclear movement family protein	39.023	Up	null	0	cytosol, 19S proteasome, outlier
TGME49_294010	yrdC domain-containing protein	86.986	Up	HMM: MRLALSFCQLGRRIRSILISFCHFSLLEVPSFTR, NN: MRLALSFCQLGRRIRSILISFCHFSLLE	0	cytosol, nucleus - chromatin
TGME49_249390	glutamate/leucine/phenylalanine/valine dehydrogenase family protein	135.699	Down	HMM: MVHVSASLPFSFFPRFFLSQPRGTRSF, NN: MVHVSASLPFSFFPRFFLSQPRGTRSF	0	cytosol, outlier
TGME49_201180	hypothetical protein	126.358	Up	HMM: MMLLRLLILLLAVAATHWVTGN, NN: MMLLRLLILLLAVAATHWVTGNAL	2	dense granules
TGME49_204320	hypothetical protein	32.123	Down	null	1	dense granules
TGME49_204340	hypothetical protein	97.093	Down	HMM: MKPSSLRILLVAWTIISDAE, NN: MKPSSLRILLVAWTIISDAE	1	dense granules
TGME49_208740	microneme protein, putative	66.265	Down	null	0	dense granules
TGME49_266050	hypothetical protein	27.293	Down	HMM: MVMWKSGSLRVLRGIGCETYRVSCAGVASLLFAVSLAILSGNTVAFAS, NN: MVMWKSGSLRVLRGIGCETYRVSCAGVASLLFAVSLAI	0	dense granules
TGME49_269920	phosphatidylserine decarboxylase	107.987	Down	HMM: MAKVMRLIIFVCVALVAISVPAASSV, NN: MAKVMRLIIFVCVALVAISVPAASSV	1	dense granules
TGME49_277270	NTPase II	37.375	Up	HMM: MWLPVHVPLLLVFGVSLSLPHGSLGT, NN: MWLPVHVPLLLVFGVSLSLPHGSLGT	0	dense granules
TGME49_290700	hypothetical protein	34.731	Down	HMM: MKRFWLCALLSLLEFSWGCNSL, NN: MKRFWLCALLSLLEFSWGCNSL	0	dense granules
TGME49_291630	hypothetical protein	25.64	Up	null	0	dense granules
TGME49_304720	hypothetical protein	649.344	Up	null	0	dense granules
TGME49_315910	hypothetical protein	62.716	Down	null	0	dense granules
TGME49_320630	phosphotransferase enzyme family protein	69.383	Down	HMM: MQVLACVLGIVCLYLRTAPAS, NN: MQVLACVLGIVCLYLRTAPAS	0	dense granules
TGME49_232270	histidine acid phosphatase superfamily protein	93.731	Down	null	0	dense granules, outlier
TGME49_253140	hypothetical protein	164.331	Down	null	0	dense granules, outlier
TGME49_264660	SAG-related sequence SRS44	262.469	Up	null	1	dense granules, outlier
TGME49_204080	histidine acid phosphatase superfamily protein	143.85	Down	HMM: MARRFDSDGVARPRREAWVLFPPTFCRRFHLLVLLLVSVSAVPLGTSQ, NN: MARRFDSDGVARPRREAWVLFPPTFCRRFHLLVLLLVSVSAV	0	endomembrane vesicles
TGME49_248670	V-type H(+)-translocating pyrophosphatase VP1	85.294	Down	HMM: MGGRRRSFFLSTAGALAPAVAT, NN: MGGRRRSFFLSTAGALAPAVAT	17	endomembrane vesicles
TGME49_291600	gamma interferon inducible lysosomal thiol reductase (GILT) protein	41.566	Down	HMM: MADIRTCAEAFFAFFLAVSLPFCGSASGATAQ, NN: MADIRTCAEAFFAFFLAVSLPFCGSASGATAQ	1	endomembrane vesicles
TGME49_285540	DNA-directed DNA polymerase	133.819	Up	null	0	endomembrane vesicles, outlier
TGME49_203240	hypothetical protein	80.261	Down	null	3	ER
TGME49_203970	dolichyl-diphosphooligosaccharide--protein glycosyltransferase	74.986	Up	null	1	ER
TGME49_205350	integral membrane protein, GNS1/SUR4 family protein, putative	37.793	Down	null	7	ER
TGME49_213790	hypothetical protein	190.488	Up	null	2	ER
TGME49_215940	Acetyl-coenzyme A transporter, putative	65.463	Up	HMM: MSASLMERLLGRDGPSIALLFLLYTLQGIPMGLSG, NN: MSASLMERLLGRDGPSIALLFLLYTLQGI	9	ER
TGME49_216180	hypothetical protein	16.44	Up	HMM: MITVILCSVLFYSLGLVAPTSAA, NN: MITVILCSVLFYSLGLVAPTSAA	3	ER
TGME49_222090	hypothetical protein	14.209	Down	null	2	ER
TGME49_223600	hypothetical protein	80.232	Up	null	9	ER
TGME49_232730	acyl-CoA:diacylglycerol acyltransferase 1-related enzyme	63.293	Up	null	9	ER
TGME49_237200	sphingolipid delta 4 desaturase/c-4 hydroxylase protein des2 family protein	48.34	Down	null	5	ER
TGME49_240860	acyltransferase domain-containing protein	31.851	Down	HMM: MASTPLRVLMTIYFYLVVSVFFLLAFLTELA, NN: MASTPLRVLMTIYFYLVVSVFFLLAFLTELAELV	1	ER
TGME49_242020	mannosyl-oligosaccharide glucosidase	151.503	Up	HMM: MRRLSLRFSARCSGVLETRSALLSRLAFSLAVSLACSLALCLALGS, NN: MRRLSLRFSARCSGVLETRSALLSRLAFSLAVSLACSLALCLAL	1	ER
TGME49_249760	vitamin k epoxide reductase family protein	18.136	Down	HMM: MAGVDRSVVVTAALGVALCMYAI, NN: MAGVDRSVVVTAALGVALCM	4	ER
TGME49_254580	UDP-galactose transporter family protein	45.522	Up	null	8	ER
TGME49_257780	hypothetical protein	181.881	Up	HMM: MRSPFGPLRGWRRDLGSVLLSSDCPVVSPR, NN: MRSPFGPLRGWRRDLGSVLLSSDCPVVSPR	2	ER
TGME49_258110	N-acetylglucosaminylphosphatidylinositol deacetylase	43.535	Up	null	1	ER
TGME49_258820	hypothetical protein	14.86	Up	HMM: MASLVQPARFLDAAVMGLFAMVLSALMLYMFGE, NN: MASLVQPARFLDAAVMGLFAMVLSAL	2	ER
TGME49_258826	hypothetical protein	111.839	Up	HMM: MWRSSPLPRSFPRLLLALASLCCLYLP, NN: MWRSSPLPRSFPRLLLALASLCCLYLP	1	ER
TGME49_267590	hypothetical protein	101.758	Up	HMM: MSSSSSGSRLSGLLALSLFLLLSLSTSR, NN: MSSSSSGSRLSGLLALSLFLLLSLSTSR	3	ER
TGME49_271760	seryl-tRNA synthetase (SerRS2)	91.795	Up	HMM: MADDGRTLGFLSFFSSCLLLNRVSLLSLTLLIFLLHLHAGTVRPA, NN: MADDGRTLGFLSFFSSCLLLNRVSLLSLTLLIFLLHLHAG	1	ER
TGME49_272695	hypothetical protein	65.734	Down	null	1	ER
TGME49_275770	hypothetical protein	32.425	Up	null	2	ER
TGME49_276190	hypothetical protein	54.675	Up	null	7	ER
TGME49_277970	dolichol-phosphate-mannose synthase family protein	27.361	Down	null	0	ER
TGME49_288030	hypothetical protein	42.62	Down	null	3	ER
TGME49_290970	8-amino-7-oxononanoate synthase	64.698	Up	null	0	ER
TGME49_295080	hypothetical protein	25.074	Up	null	0	ER
TGME49_304460	zinc finger, C3HC4 type (RING finger) domain-containing protein	76.951	Down	HMM: MAGIHVRYRTYALLSLLSVVTLVLRTW, NN: MAGIHVRYRTYALLSLLSVVTLVLRTW	5	ER
TGME49_311840	hypothetical protein	25.723	Down	null	4	ER
TGME49_203420	4'-phosphopantetheinyl transferase domain-containing protein	123.184	Down	HMM: MGTTSRRAGFSGSAPLEAEQAWSWKERRKPHPVLSMSNFVTSVSLLSSSLLHSPSSSSSS, NN: MGTTSRRAGFSGSAPLEAEQAWSWKERRKPHPVLSMSNFVTSV	2	ER 2, outlier
TGME49_273410	tyrosine-tRNA ligase	134.653	Up	HMM: MCVFLLCWALRKQVRLRFHRAWLSLLYPASRSRLFPSLSVVLPALCFRFLHNVVSF, NN: MCVFLLCWALRKQVRLRFHRAWLSLLYPASRSR	0	ER 2, outlier
TGME49_281640	hypothetical protein	99.957	Up	null	7	ER, outlier
TGME49_289150	hypothetical protein	111.429	Down	null	1	ER, outlier
TGME49_216460	hypothetical protein	65.167	Down	HMM: MSYQRKTIPFIMRILCGSGQILFLPSEGN, NN: MSYQRKTIPFIMRILCGSGQ	4	Golgi
TGME49_227410	hypothetical protein	116.437	Up	HMM: MHAKSANASPLFLRLLLFFPAVEGSLRFFTRRLALWFSLAVLVFWTLLGRAGTLAS, NN: MHAKSANASPLFLRLLLFFPAVEGS	1	Golgi
TGME49_233760	hypothetical protein	52.451	Down	null	7	Golgi
TGME49_234530	hypothetical protein	17.462	Down	null	2	Golgi
TGME49_242080	hypothetical protein	21.645	Down	null	1	Golgi
TGME49_248840	transporter, major facilitator family protein	79.983	Up	null	9	Golgi
TGME49_258770	polypeptide n-acetylgalactosaminyltransferase 12, putative	78.943	Up	null	1	Golgi
TGME49_262490	alpha/beta hydrolase, putative	29.098	Down	null	0	Golgi
TGME49_287230	inorganic anion transporter, sulfate permease (SulP) family protein	72.147	Up	null	11	Golgi
TGME49_300290	SNARE domain-containing protein	25.215	Down	null	1	Golgi
TGME49_307820	hypothetical protein	46.063	Down	HMM: MAGRKRSVAFLIFIFPLFASLACNGS, NN: MAGRKRSVAFLIFIFPLFASLAC	2	Golgi
TGME49_258950	lectin family protein	70.29	Up	HMM: MAQGTVSLPRSGISAVSAFTLASCLLLSPLALFFLSVTASQ, NN: MAQGTVSLPRSGISAVSAFTLASCLLLSPLALFFLSVTAS	2	Golgi, ER
TGME49_216000	alveolin domain containing intermediate filament IMC3	57.999	Down	null	0	IMC
TGME49_219170	hypothetical protein	33.334	Down	null	0	IMC
TGME49_219270	multi-pass transmembrane protein	43.033	Down	null	6	IMC
TGME49_219320	acid phosphatase GAP50	46.606	Down	HMM: MAGAPVAAAPAASSRVAGDSGRSRALSSFFSVFSLCVFSVFLATPTAVVAQ, NN: MAGAPVAAAPAASSRVAGDSGRSRALSSFFSVFSLCVFSVFLATPTAVVAQ	2	IMC
TGME49_220270	alveolin domain containing intermediate filament IMC6	48.634	Down	null	0	IMC
TGME49_222220	alveolin domain containing intermediate filament IMC7	46.811	Up	null	0	IMC
TGME49_224000	hypothetical protein	82.201	Down	null	0	IMC
TGME49_230210	alveolin domain containing intermediate filament IMC10	61.187	Down	null	0	IMC
TGME49_230690	LNS2 (Lipin/Ned1/Smp2) protein	167.873	Down	null	0	IMC
TGME49_231630	alveolin domain containing intermediate filament IMC4	50.171	Down	null	0	IMC
TGME49_232260	hypothetical protein	32.342	Down	null	3	IMC
TGME49_235470	myosin A	93.318	Down	null	0	IMC
TGME49_235690	hypothetical protein	24.969	Down	null	0	IMC
TGME49_237820	IMC sub-compartment protein ISP2	17.396	Down	null	0	IMC
TGME49_239800	hypothetical protein	34.073	Down	null	0	IMC
TGME49_240570	hypothetical protein	57.406	Down	null	4	IMC
TGME49_242070	cAMP-dependent protein kinase regulatory subunit	42.796	Down	null	0	IMC
TGME49_249850	GAP40 protein	43.081	Down	null	9	IMC
TGME49_257680	myosin light chain MLC1	24.123	Down	null	0	IMC
TGME49_260540	alveolin domain containing intermediate filament IMC14	83.303	Down	null	0	IMC
TGME49_266090	hypothetical protein	49.579	Down	HMM: MLGTFCGESNRDECGNRWSRMCNFFWWCSFVVAAGTLAL, NN: MLGTFCGESNRDECGNRWSRMCNFFWWCSFVVAA	4	IMC
TGME49_271970	glideosome-associated protein with multiple-membrane spans GAPM3	34.316	Down	null	5	IMC
TGME49_297150	MORN repeat-containing protein	50.394	Up	null	0	IMC
TGME49_304670	leucine rich repeat-containing protein	38.294	Down	null	0	IMC
TGME49_312100	plasma membrane-type Ca(2+)-ATPase A1 PMCAA1	199.141	Down	null	11	IMC
TGME49_313380	hypothetical protein	31.512	Down	null	0	IMC
TGME49_316540	IMC sub-compartment protein ISP3	18.39	Down	null	0	IMC
TGME49_224520	alveolin domain containing intermediate filament IMC8	22.943	Down	null	0	IMC, outlier
TGME49_224530	alveolin domain containing intermediate filament IMC5	62.623	Down	null	0	IMC, outlier
TGME49_226220	alveolin domain containing intermediate filament IMC9	80.158	Down	null	0	IMC, outlier
TGME49_231070	protein kinase	141.487	Down	null	0	IMC, outlier
TGME49_253470	alveolin domain containing intermediate filament IMC13	45.788	Down	null	0	IMC, outlier
TGME49_255190	myosin C	132.656	Down	null	0	IMC, outlier
TGME49_293360	hypothetical protein	26.751	Down	null	0	IMC, outlier
TGME49_204130	perforin-like protein PLP1	125.505	Down	null	0	micronemes
TGME49_218520	microneme protein MIC6	36.669	Down	HMM: MRLFRCCAAAVVAAESLLWLKNGS, NN: MRLFRCCAAAVVAAESLLWLKNGS	1	micronemes
TGME49_221480	hypothetical protein	31.704	Down	null	2	micronemes
TGME49_245485	microneme protein MIC9	31.557	Down	HMM: MRVSFNVPLHRTGFVLVCVIGSLCWCIAPA, NN: MRVSFNVPLHRTGFVLVCVIGSLCWCIAPAP	2	micronemes
TGME49_250870	DHHC zinc finger domain-containing protein	39.821	Down	null	4	micronemes
TGME49_255260	apical membrane antigen AMA1	63.02	Down	null	1	micronemes
TGME49_260190	microneme protein MIC13	51.459	Down	HMM: MVGVFQLCLLTCLLCLLKGSDAI, NN: MVGVFQLCLLTCLLCLLKGSDAI	0	micronemes
TGME49_261780	microneme protein MIC7	36.339	Down	null	1	micronemes
TGME49_265790	hypothetical protein	41.155	Down	HMM: MGYGQKKKRRQQEEIPEQTSSIWYMLCICVLAGAGLSV, NN: MGYGQKKKRRQQEEIPEQTSSIWYMLCICVLAGAGLSV	5	micronemes
TGME49_273320	hypothetical protein	25.588	Down	HMM: MKVLFFLGLLAGGLLCSAD, NN: MKVLFFLGLLAGGLLCSAD	1	micronemes
TGME49_291890	microneme protein MIC1	48.628	Down	HMM: MGQALFLTVLLPVLFGVGPEAYGE, NN: MGQALFLTVLLPVLFGV	0	micronemes
TGME49_247195	microneme protein MIC15	319.969	Down	HMM: MGVLRVRSFPLQQRTMVFRATREPFRLPLVPAFIALFLLKGVTCQ, NN: MGVLRVRSFPLQQRTMVFRATREPFRLPLVPAFIALFLLKGVTCQ	1	micronemes, outlier
TGME49_249970	hypothetical protein	24.711	Down	null	0	micronemes, outlier
TGME49_261080	kringle domain-containing protein	345.979	Down	null	9	micronemes, outlier
TGME49_277910	thrombospondin type 1 domain-containing protein	134.402	Down	HMM: MMPATRRSASLLVSARGSAAR, NN: MMPATRRSASLLVSARGSAA	1	micronemes, outlier
TGME49_289620	cathepsin CPC1	79.233	Down	HMM: MEGMGSLRRRCAALPLVAGFLVFLGSIGVKAD, NN: MEGMGSLRRRCAALPLVAGFLVFLGSIGVKAD	1	micronemes, outlier
TGME49_214310	hypothetical protein	75.844	Down	null	0	mitochondrion - membranes
TGME49_235730	hypothetical protein	37.945	Down	HMM: MAADRLRADGAPADFPRCLSSLPRSRLLSFISAFSLSPSLSR, NN: MAADRLRADGAPADFPRCLSSLPRSRLLSFISAFSLSPSLSR	0	mitochondrion - membranes
TGME49_249320	flavodoxin domain-containing protein	113.022	Down	null	0	mitochondrion - membranes
TGME49_249325	hypothetical protein	17.456	Down	HMM: MGPEEGSSRVASSPPSFFSSSLLFPALLPRPSKAS, NN: MGPEEGSSRVASSPPSFFSSSLLFPALLPRPSKAS	0	mitochondrion - membranes
TGME49_249702	MC family transporter, putative	31.17	Up	null	0	mitochondrion - membranes
TGME49_255910	PfMNL-2 CISD1 family iron-sulfur protein, putative	24.954	Up	HMM: MDELLQMLVVFLRAR, NN: MDELLQMLVVFLRARVPSTFRAR	0	mitochondrion - membranes
TGME49_257160	hypothetical protein	16.481	Up	HMM: MAGSYFAVRAGSGALAATTNAS, NN: MAGSYFAVRAGSGALAA	0	mitochondrion - membranes
TGME49_257440	SCO1/SenC protein	58.603	Up	HMM: MSAQNALSGIAGSLRGLRAA, NN: MSAQNALSGIAGSLRGLRAAGGKAGLPSLRLPSFASAC	1	mitochondrion - membranes
TGME49_258650	protoheme ferro-lyase, putative	102.024	Up	null	0	mitochondrion - membranes
TGME49_266850	3-demethylubiquinone-9 3-O-methyltransferase	53.823	Up	null	0	mitochondrion - membranes
TGME49_270090	hypothetical protein	206.672	Up	null	0	mitochondrion - membranes
TGME49_278990	phosphate carrier, putative	53.092	Up	null	1	mitochondrion - membranes
TGME49_286720	heat shock protein HSP28	31.093	Up	null	0	mitochondrion - membranes
TGME49_289960	hypothetical protein	78.063	Down	HMM: MFLPPFSIFLQSLLCESS, NN: MFLPPFSIFLQSLLCESS	1	mitochondrion - membranes
TGME49_297160	hypothetical protein	60.493	Down	HMM: MPPVLPRGGLLPASAAAAVLRAA, NN: MPPVLPRGGLLPASAAAAVLRAAQLDCAAAL	0	mitochondrion - membranes
TGME49_300020	ATP-dependent metallopeptidase HflB subfamily protein	109.677	Down	HMM: MRSLLAQAPLGPRGTPAQAAALQGTLSTVAVRRIQIGDRRLPTFLSSSLSLASSCASAR, NN: MRSLLAQAPLGPRGTPAQAA	2	mitochondrion - membranes
TGME49_304640	hypothetical protein	125.95	Up	null	0	mitochondrion - membranes
TGME49_315770	cytochrome p450 superfamily protein	62.584	Down	null	1	mitochondrion - membranes
TGME49_330000	cytochrome b	41.594	Up	HMM: MVSRTLSLSMSLFRAHLVFYRCALNLNSSYNFGFLVAMTFVLQIITGITLAF, NN: MVSRTLSLSMSLFRAHLV	8	mitochondrion - membranes
TGME49_209020	hypothetical protein	102.055	Up	null	0	mitochondrion - membranes, mitochondrion - soluble
TGME49_215920	hypothetical protein	39.563	Down	HMM: MAASARRLSSLTRDAHKRFVPPSSSLFPLSPPVSAA, NN: MAASARRLSSLTRDAHKRFVPPSSSLFPLSPPVSAA	0	mitochondrion - soluble
TGME49_228060	hypothetical protein	123.101	Up	null	0	mitochondrion - soluble
TGME49_228250	elongation factor Tu GTP binding domain-containing protein	122.284	Up	HMM: MRASTLLSSPFSSSFSGGVCSFLSPFFLLSSPRWSV, NN: MRASTLLSSPFSSSFSGGVCSF	0	mitochondrion - soluble
TGME49_249000	regulator of chromosome condensation (RCC1) repeat-containing protein	76.839	Up	HMM: MRSAAAIFASRPKGARWAAVSASKVAAS, NN: MRSAAAIFASRPKGARWAAVSASKVAAS	0	mitochondrion - soluble
TGME49_254800	hypothetical protein	13.617	Down	HMM: MTRPLVSKALRAAFVHTAAFSSAV, NN: MTRPLVSKALRAAFVHTAAFSSAV	0	mitochondrion - soluble
TGME49_263110	hypothetical protein	43.894	Down	HMM: MQSPCGGVMAVQLAALPSLGQ, NN: MQSPCGGVMAVQLAALPSLGQLG	0	mitochondrion - soluble
TGME49_263530	chaperonin, putative	13.862	Up	null	0	mitochondrion - soluble
TGME49_265220	co-chaperone GrpE protein	37.573	Up	HMM: MSLSCASSSLSRGARGV, NN: MSLSCASSSLSRGARGV	0	mitochondrion - soluble
TGME49_266260	hypothetical protein	32.719	Down	HMM: MPTSILRRVACAALSLPQRAA, NN: MPTSILRRVACAALSLPQRAA	0	mitochondrion - soluble
TGME49_267330	fumarate hydratase	84.292	Up	HMM: MRGTRRFFHASCSFFVLTSSTLQL, NN: MRGTRRFFHASCSFFVLTSSTLQLDSF	0	mitochondrion - soluble
TGME49_285170	ribosomal RNA large subunit methyltransferase I, putative	93.41	Up	null	0	mitochondrion - soluble
TGME49_289780	ATP-dependent hsl protease ATP-binding subunit hslU, putative	101.617	Down	null	0	mitochondrion - soluble
TGME49_292300	DNA-directed RNA polymerase III RPC8	124.816	Down	HMM: MHGARGASSESSFFSVRLLLGSSLFSPRPLLSV, NN: MHGARGASSESSFFSVRLLLGSSLFSPRPLLSV	0	mitochondrion - soluble
TGME49_294190	enoyl-CoA hydratase/isomerase family protein	80.236	Down	null	0	mitochondrion - soluble
TGME49_301120	acetyl-CoA acetyltransferase	43.892	Down	null	0	mitochondrion - soluble
TGME49_314680	hypothetical protein	11.972	Down	null	0	mitochondrion - soluble
TGME49_315230	hypothetical protein	68.306	Down	null	0	mitochondrion - soluble
TGME49_316330	superoxide dismutase SOD2	31.462	Down	HMM: MSITAVLVPALRLSAALVAAPIGLAL, NN: MSITAVLVPALRLSAALVAAPIGLAL	0	mitochondrion - soluble
TGME49_318290	hypothetical protein	73.38	Up	null	0	mitochondrion - soluble
TGME49_318400	hypothetical protein	155.885	Up	null	0	mitochondrion - soluble
TGME49_236000	ferredoxin, putative	33.226	Down	HMM: MMGQMQSLSAGGASLLADGSVCR, NN: MMGQMQSLSAGGASLLADGSVCRKALLAAILSPRAIGTLRAS	0	mitochondrion - soluble, outlier
TGME49_265180	hypothetical protein	48.373	Up	null	0	mitochondrion - soluble, outlier
TGME49_205500	hypothetical protein	116.857	Up	null	0	nucleolus
TGME49_232380	WD domain, G-beta repeat-containing protein	134.252	Up	null	0	nucleolus
TGME49_310380	brix domain containing protein	35.526	Down	null	0	nucleolus
TGME49_312618	hypothetical protein	59.25	Up	null	0	nucleolus
TGME49_313830	AARP2CN (NUC121) domain-containing protein	142.772	Up	null	0	nucleolus
TGME49_207990	ribosomal RNA large subunit methyltransferase J protein	109.458	Up	null	0	nucleolus, nucleus - non-chromatin
TGME49_206300	hypothetical protein	90.006	Up	null	0	nucleolus, outlier
TGME49_216210	hypothetical protein	603.662	Up	null	0	nucleolus, outlier
TGME49_226520	hypothetical protein	26.639	Down	null	0	nucleolus, outlier
TGME49_238880	hypothetical protein	342.436	Up	null	0	nucleolus, outlier
TGME49_239480	RNB family domain-containing protein	129.84	Up	null	0	nucleolus, outlier
TGME49_247390	ATPase, AAA family protein	421.729	Up	HMM: MDEKRKKKRRRRAQASSPALPASCSAALCASGPSSVVCS, NN: MDEKRKKKRRRRAQASSPALPASCSAA	0	nucleolus, outlier
TGME49_249010	hypothetical protein	59.101	Up	null	0	nucleolus, outlier
TGME49_249360	RED family protein	66.927	Down	null	0	nucleolus, outlier
TGME49_255180	ubiquitin carboxyl-terminal hydrolase	454.311	Up	null	0	nucleolus, outlier
TGME49_257640	hypothetical protein	90.777	Up	HMM: MEFSPSPTGGLAVQAQALWAALDDLAESD, NN: MEFSPSPTGGLAVQAQALWAALDDLAESD	0	nucleolus, outlier
TGME49_261980	gorasp2-prov protein	50.508	Down	null	0	nucleolus, outlier
TGME49_264710	bucentaur or craniofacial development domain-containing protein	49.497	Up	null	0	nucleolus, outlier
TGME49_264752	HEAT repeat-containing protein	367.857	Up	HMM: MPTGQRRTHLLALLQAVSAVCTSCWPH, NN: MPTGQRRTHLLALLQAVSAV	0	nucleolus, outlier
TGME49_264780	UTP-glucose-1-phosphate uridylyltransferase subfamily protein	97.009	Up	null	0	nucleolus, outlier
TGME49_266930	general transcription factor IIH polypeptide 3 GTF2H3	57.424	Down	null	0	nucleolus, outlier
TGME49_271290	hypothetical protein	120.853	Up	null	0	nucleolus, outlier
TGME49_272040	WD domain, G-beta repeat-containing protein	358.194	Up	null	0	nucleolus, outlier
TGME49_274130	TBC domain-containing protein	226.431	Up	null	0	nucleolus, outlier
TGME49_281610	hypothetical protein	32.715	Down	null	0	nucleolus, outlier
TGME49_286230	hypothetical protein	279.296	Up	null	0	nucleolus, outlier
TGME49_289510	hypothetical protein	101.555	Up	null	0	nucleolus, outlier
TGME49_315610	hypothetical protein	15.97	Down	null	0	nucleolus, outlier
TGME49_320120	diadenosine tetraphosphatase family protein	25.44	Down	HMM: MSLCLPSVRGRVAGASLSPLVSSLFFVNFTPCFLRRMALLSSTSLSKSLPSSSVSS, NN: MSLCLPSVRGRVAGASLSPLVSSL	0	nucleolus, outlier
TGME49_203820	hypothetical protein	136.013	Down	null	0	nucleus - chromatin
TGME49_212150	hypothetical protein	128.594	Up	null	0	nucleus - chromatin
TGME49_213890	Myb family DNA-binding domain-containing protein	118.16	Up	HMM: MNTSQIPRVRSAAVHSVSLLPRLFGGAAQ, NN: MNTSQIPRVRSAAVHSVSLLPRLFGGAA	0	nucleus - chromatin
TGME49_214610	hypothetical protein	354.77	Up	HMM: MASPSSPPSSPSRPPSCSSLPSSGCLLPPPLPVAAA, NN: MASPSSPPSSPSRPPSCSSLPSSGCLLPPPLPVAAA	0	nucleus - chromatin
TGME49_216220	AP2 domain transcription factor AP2XI-5	89.485	Up	null	0	nucleus - chromatin
TGME49_217600	calcium-dependent protein kinase CDPK9	75.6	Down	null	0	nucleus - chromatin
TGME49_220230	leucine rich repeat-containing protein	128.83	Down	HMM: MRPPLGTPLFFPSSAPSSPASVRAA, NN: MRPPLGTPLFFPSSAPSSPASVRAA	0	nucleus - chromatin
TGME49_222920	mbp-1 interacting protein-2a family protein	15.835	Down	null	0	nucleus - chromatin
TGME49_223110	glycolipid transfer protein GLTP	25.338	Up	null	0	nucleus - chromatin
TGME49_224150	hypothetical protein	138.039	Up	null	0	nucleus - chromatin
TGME49_224870	hypothetical protein	927.311	Up	null	0	nucleus - chromatin
TGME49_225060	nucleoredoxin family protein	45.224	Up	null	0	nucleus - chromatin
TGME49_230000	hypothetical protein	690.517	Up	null	0	nucleus - chromatin
TGME49_230220	hypothetical protein	136.709	Up	null	0	nucleus - chromatin
TGME49_231210	sarcalumenin/eps15 family protein	66.864	Down	null	0	nucleus - chromatin
TGME49_232650	hypothetical protein	48.188	Down	null	0	nucleus - chromatin
TGME49_235670	hypothetical protein	59.913	Up	null	0	nucleus - chromatin
TGME49_239260	histone H4	11.439	Down	null	0	nucleus - chromatin
TGME49_240650	coatomer protein complex, subunit alpha, putative	142.952	Up	null	0	nucleus - chromatin
TGME49_242030	hypothetical protein	132.839	Up	null	0	nucleus - chromatin
TGME49_244910	MIZ/SP-RING zinc finger domain-containing protein	145.171	Up	null	0	nucleus - chromatin
TGME49_246030	mediator complex subunit MED17	96.475	Up	null	0	nucleus - chromatin
TGME49_246970	3'-5' exonuclease domain-containing protein	146.177	Up	null	0	nucleus - chromatin
TGME49_253040	actin-related protein ARP4A	77.028	Up	HMM: MPPPTAAAASASPLPASAS, NN: MPPPTAAAASASPLPASAS	0	nucleus - chromatin
TGME49_254940	MIF4G domain-containing protein	391.814	Up	null	0	nucleus - chromatin
TGME49_255240	hypothetical protein	270.264	Up	null	0	nucleus - chromatin
TGME49_263000	Beige/BEACH domain-containing protein	206.634	Down	null	0	nucleus - chromatin
TGME49_264890	hypothetical protein	199.926	Up	null	0	nucleus - chromatin
TGME49_265110	ribosome biogenesis protein, putative	117.845	Up	null	0	nucleus - chromatin
TGME49_265330	cell-cycle-associated protein kinase GSK, putative	44.467	Down	null	0	nucleus - chromatin
TGME49_266280	HEAT repeat-containing protein	101.723	Up	null	0	nucleus - chromatin
TGME49_268330	hypothetical protein	310.844	Up	null	1	nucleus - chromatin
TGME49_270810	hypothetical protein	60.68	Down	null	0	nucleus - chromatin
TGME49_271440	NPL4 family protein	55.802	Up	null	0	nucleus - chromatin
TGME49_273580	hypothetical protein	155.193	Up	null	0	nucleus - chromatin
TGME49_278470	hypothetical protein	66.649	Down	null	0	nucleus - chromatin
TGME49_280590	hypothetical protein	288.203	Up	null	0	nucleus - chromatin
TGME49_281400	phosphofructokinase domain-containing protein	380.167	Up	null	0	nucleus - chromatin
TGME49_285660	DEAD/DEAH box helicase domain-containing protein	175.963	Up	null	1	nucleus - chromatin
TGME49_286160	non-specific serine/threonine protein kinase	310.362	Up	null	0	nucleus - chromatin
TGME49_288580	RNA methylase, putative	23.427	Up	null	0	nucleus - chromatin
TGME49_289080	HEAT repeat-containing protein	129.378	Up	HMM: MSLSPLMASTGPLLDRASAG, NN: MSLSPLMASTGPLLDRASAG	0	nucleus - chromatin
TGME49_289120	hypothetical protein	290.56	Up	null	0	nucleus - chromatin
TGME49_295000	hypothetical protein	110.506	Up	null	0	nucleus - chromatin
TGME49_312510	Ku70/Ku80 beta-barrel domain-containing protein	122.364	Down	HMM: MALPGQSFKRVIVLLLDCGATMQQ, NN: MALPGQSFKRVIVLLLDCGATMQQ	0	nucleus - chromatin
TGME49_313270	hypothetical protein	281.36	Up	null	0	nucleus - chromatin
TGME49_313350	hypothetical protein	46.882	Down	null	0	nucleus - chromatin
TGME49_315860	EF hand domain-containing protein	690.203	Up	null	0	nucleus - chromatin
TGME49_290310	hypothetical protein	200.812	Up	HMM: MAAVAASVRLRSASLAEGVTSAA, NN: MAAVAASVRLRSASLAE	0	nucleus - chromatin, nucleolus
TGME49_201400	Sin3-associated polypeptide SAP18	97.203	Down	null	0	nucleus - non-chromatin
TGME49_201680	eukaryotic initiation factor-3 subunit 10, putative	119.125	Up	null	0	nucleus - non-chromatin
TGME49_203370	hypothetical protein	81.061	Up	null	0	nucleus - non-chromatin
TGME49_203490	GNL3L/Grn1 GTPase	76.487	Up	null	0	nucleus - non-chromatin
TGME49_213300	hypothetical protein	538.696	Up	null	0	nucleus - non-chromatin
TGME49_215400	RNA recognition motif-containing protein	41.35	Up	null	0	nucleus - non-chromatin
TGME49_219300	ran binding protein	38.512	Up	null	0	nucleus - non-chromatin
TGME49_224480	cell-cycle-associated protein kinase CLK, putative	189.04	Down	null	0	nucleus - non-chromatin
TGME49_228100	hypothetical protein	139.35	Up	null	0	nucleus - non-chromatin
TGME49_229360	transaldolase	61.447	Up	null	0	nucleus - non-chromatin
TGME49_244420	hypothetical protein	36.169	Down	null	0	nucleus - non-chromatin
TGME49_244880	DNA-directed RNA polymerase I RPA1	302.089	Up	null	0	nucleus - non-chromatin
TGME49_246630	DNA-directed RNA polymerase I RPA43	52.989	Up	null	0	nucleus - non-chromatin
TGME49_253520	U3 small nucleolar RNA-associated protein 6 protein	140.502	Up	null	0	nucleus - non-chromatin
TGME49_254600	ubiquitin family protein	8.761	Up	null	0	nucleus - non-chromatin
TGME49_259220	DEAD/DEAH box helicase domain-containing protein	104.168	Up	HMM: MSISRQGTSKKLLYSSLLFFFRCLTSSVLFLTLSSPSYQV, NN: MSISRQGTSKKLLYSSLLFFFRCLTSS	1	nucleus - non-chromatin
TGME49_262070	ribosomal rna assembly protein mis3, putative	45.139	Down	null	0	nucleus - non-chromatin
TGME49_267480	tRNA (guanine(26)-N(2))-dimethyltransferase, putative	76.064	Up	null	0	nucleus - non-chromatin
TGME49_268200	RNA recognition motif-containing protein	66.43	Up	null	0	nucleus - non-chromatin
TGME49_273840	brix domain-containing protein	73.835	Up	null	0	nucleus - non-chromatin
TGME49_278500	ribosomal RNA large subunit methyltransferase J protein	158.351	Down	null	0	nucleus - non-chromatin
TGME49_285950	hypothetical protein	91.323	Down	null	0	nucleus - non-chromatin
TGME49_290850	WD-40 repeat protein	58.308	Down	null	0	nucleus - non-chromatin
TGME49_294350	DEAD/DEAH box helicase domain-containing protein	273.731	Up	null	0	nucleus - non-chromatin
TGME49_294780	hypothetical protein	35.062	Down	null	0	nucleus - non-chromatin
TGME49_301390	ribosome biogenesis protein BOP1, putative	117.371	Up	null	0	nucleus - non-chromatin
TGME49_305010	pre-mRNA branch site protein p14, putative	17.215	Down	null	0	nucleus - non-chromatin
TGME49_306290	DNA-directed RNA polymerase III RPC1	194.35	Up	null	0	nucleus - non-chromatin
TGME49_309950	NLE (NUC135) domain-containing protein	65.351	Up	null	0	nucleus - non-chromatin
TGME49_311030	hypothetical protein	402.5	Up	null	0	nucleus - non-chromatin
TGME49_312280	pre-mRNA-splicing factor ATP-dependent RNA helicase, putative	136.383	Down	null	0	nucleus - non-chromatin
TGME49_313130	hypothetical protein	133.691	Up	null	0	nucleus - non-chromatin
TGME49_313990	CBF/Mak21 family protein	148.845	Up	null	0	nucleus - non-chromatin
TGME49_314470	hypothetical protein	39.67	Up	null	0	nucleus - non-chromatin
TGME49_316350	hypothetical protein	44.365	Up	null	0	nucleus - non-chromatin
TGME49_318140	SART-1 family protein	97.679	Down	null	0	nucleus - non-chromatin
TGME49_254300	hypothetical protein	196.441	Up	null	0	nucleus - non-chromatin, 40S ribosome
TGME49_260260	ribosomal protein RPP1	18.802	Up	null	0	nucleus - non-chromatin, 40S ribosome
TGME49_202980	hypothetical protein	210.467	Up	null	0	nucleus - non-chromatin, nucleolus
TGME49_207720	hypothetical protein	177.011	Up	null	0	nucleus - non-chromatin, nucleolus
TGME49_214200	WD domain, G-beta repeat-containing protein	150.517	Up	null	0	nucleus - non-chromatin, nucleolus
TGME49_225125	pre-rRNA processing protein	310.132	Up	null	0	nucleus - non-chromatin, nucleolus
TGME49_234390	hypothetical protein	45.716	Down	null	0	nucleus - non-chromatin, nucleolus
TGME49_287180	hypothetical protein	239.162	Up	null	0	nucleus - non-chromatin, nucleolus
TGME49_319658	CBF/Mak21 family protein	73.893	Up	null	0	nucleus - non-chromatin, nucleolus
TGME49_229140	MaoC family domain-containing protein	35.938	Down	null	0	nucleus - non-chromatin, outlier
TGME49_202720	RNB family domain-containing protein	258.861	Up	HMM: MKTLMSKLPSGCGRSSPTHSHSALWIRASSPHLRRPSNSGPGRLPLSSTSPLSVAAPAISAA, NN: MKTLMSKLPSGCGRSS	0	outlier
TGME49_203880	hypothetical protein	173.075	Down	null	0	outlier
TGME49_216170	SufS subfamily cysteine desulfurase	82.053	Up	HMM: MASGAVAFLLSFFLGQMRRRYSS, NN: MASGAVAFLLSFFLGQMRRR	0	outlier
TGME49_216960	elongation factor Tu GTP binding domain-containing protein	92.102	Up	null	0	outlier
TGME49_217870	DHHC zinc finger domain-containing protein	47.156	Down	HMM: MYATSRAVRGLSLIPLVIVTGLFLFAW, NN: MYATSRAVRGLSLIPLVIVTGLFLFAWITYVYIY	4	outlier
TGME49_218720	calcium-dependent protein kinase CDPK6	160.929	Down	null	0	outlier
TGME49_220900	hypothetical protein	78.151	Down	null	0	outlier
TGME49_221922	NifU family domain-containing protein	51.751	Down	null	0	outlier
TGME49_230980	myosin I	200.74	Up	null	0	outlier
TGME49_232780	hypothetical protein	77.671	Down	null	0	outlier
TGME49_253400	hypothetical protein	104.47	Down	HMM: MTNSSLPSTLRLPRREPGVAWGRSSLSRLLLLSLYLGFFCSRETESA, NN: MTNSSLPSTLRLPRREPGVAWGRSSLSRLLLLSLYLGFFCSR	0	outlier
TGME49_257470	myosin J	273.909	Down	null	0	outlier
TGME49_260800	hypothetical protein	160.048	Up	HMM: MTRFLHAPRATGERICASPCGVFLLLLPFLLSSLLPS, NN: MTRFLHAPRATGERICASPCGVFLLLLPFLLSS	0	outlier
TGME49_268880	hypothetical protein	44.062	Down	HMM: MWCLRFSLVFLSATCLAFSTRSPVLAA, NN: MWCLRFSLVFLSATCLAF	0	outlier
TGME49_269140	transport protein particle component, Bet3 domain-containing protein	23.034	Up	null	1	outlier
TGME49_269970	hypothetical protein	13.079	Down	null	1	outlier
TGME49_270960	hypothetical protein	138.427	Up	null	0	outlier
TGME49_289760	hypothetical protein	96.409	Down	HMM: MPLLFPMLAVLLSTVFSALSSATPSLALSS, NN: MPLLFPMLAVLLSTVFSALSSAT	0	outlier
TGME49_293540	hypothetical protein	79.245	Down	null	0	outlier
TGME49_297520	proteophosphoglycan PPG1	163.166	Down	HMM: MPAPPPSPSLLSPSPAGVSSAS, NN: MPAPPPSPSLLSPSPAGVSSA	0	outlier
TGME49_301210	NAD(P) transhydrogenase subunit beta, putative	132.884	Up	null	13	outlier
TGME49_310240	hypothetical protein	55.025	Down	null	2	outlier
TGME49_312840	hypothetical protein	119.65	Up	null	0	outlier
TGME49_313495	hypothetical protein	318.611	Up	null	0	outlier
TGME49_320440	hypothetical protein	243.976	Up	HMM: MKTRKVLYVVALLRRVSTSATARPAHSSSCTLPTTRLPLRKSSFSFFFSFFSLFVCFCLGL, NN: MKTRKVLYVVALLRRVSTSATAR	1	outlier
TGME49_312490	hypothetical protein	49.078	Up	null	0	outlier, 19S proteasome
TGME49_211850	hypothetical protein	18.449	Down	null	0	outlier, apical 2
TGME49_213520	peptidase M20D, amidohydrolase	55.116	Up	HMM: MPRGGHKKMASKTFWNRGIIFLRSYSFFFLPLLAAAASSPAS, NN: MPRGGHKKMASKTFWNRGIIFLRSYSFFFLPLLAAAA	1	outlier, apicoplast
TGME49_318275	peptidyl-prolyl cis-trans isomerase, FKBP-type domain-containing protein	63.72	Up	HMM: MALSPFPSAPCSLCFLPPRCRGFAAAPLIRFFVASLSVSLSLVLSA, NN: MALSPFPSAPCSLCFLPPRCRGFAAAPLIRFFVASLSVSLSL	0	outlier, apicoplast
TGME49_212210	hypothetical protein	28.896	Down	null	0	outlier, cytosol
TGME49_206340	hypothetical protein	19.986	Down	null	1	outlier, endomembrane vesicles
TGME49_227570	transmembrane amino acid transporter protein	56.623	Down	null	9	outlier, endomembrane vesicles
TGME49_240560	MAPEG family protein	22.203	Down	null	3	outlier, endomembrane vesicles
TGME49_314890	ThiF family protein	315.894	Up	null	2	outlier, endomembrane vesicles
TGME49_212980	hypothetical protein	75.774	Down	null	1	outlier, ER
TGME49_215290	saccharopine dehydrogenase domain-containing protein	48.116	Down	null	0	outlier, ER
TGME49_269290	hypothetical protein	503.346	Up	null	0	outlier, ER
TGME49_222880	hypothetical protein	80.07	Up	HMM: MPSSSICLSPFVVAAFFLLRWSLPLLDLNSSLYLVDAA, NN: MPSSSICLSPFVVAAFFLLRWSLPLLDLNSSLYLVDAA	0	outlier, ER 2
TGME49_267150	SAG-related sequence SRS38C	41.377	Down	HMM: MVRLPQVGATFSGAFFSSPRLPLDCVVQLRLSRVSIMWLTLLLLASASELYGS, NN: MVRLPQVGATFSGAFFSSPRLPLDCVVQLRLSRVSIMWLTLLLLASAS	0	outlier, ER 2
TGME49_292000	hypothetical protein	113.943	Up	null	0	outlier, ER 2
TGME49_316110	ribosomal protein RPS15	73.245	Up	null	0	outlier, ER 2
TGME49_291590	hypothetical protein	114.976	Up	null	0	outlier, mitochondrion - soluble
TGME49_202070	hypothetical protein	841.802	Up	null	0	outlier, nucleolus
TGME49_216080	apical complex lysine methyltransferase	79.431	Down	null	0	outlier, nucleolus
TGME49_217640	hypothetical protein	13.662	Down	null	0	outlier, nucleolus
TGME49_261250	histone H2A1	19.545	Down	null	0	outlier, nucleolus
TGME49_265010	glutamate 5-kinase domain-containing protein	101.29	Up	null	0	outlier, nucleolus
TGME49_285730	TBC domain containing protein	50.705	Down	null	0	outlier, nucleolus
TGME49_313665	hypothetical protein	49.487	Down	null	0	outlier, nucleolus
TGME49_318170	hypothetical protein	43.741	Down	null	0	outlier, nucleolus
TGME49_213730	lanthionine synthetase C family protein	46.4	Down	HMM: MPRSRTLQSRAFLNVAAEAPASAG, NN: MPRSRTLQSRAFLNVAAEAPASAG	0	outlier, nucleus - non-chromatin
TGME49_214230	Dopey, N-terminal domain-containing protein	333.934	Up	null	0	outlier, PM - peripheral 2
TGME49_224470	hypothetical protein	66.789	Down	null	0	outlier, PM - peripheral 2
TGME49_262080	hypothetical protein	79.777	Up	HMM: MPVHKKFPSARFVIRTPSAFAIHGLIITCALLLLGRNCVSN, NN: MPVHKKFPSARFVIRTPSAFAIHGLIITCALLLLGRNCVSN	3	outlier, PM - peripheral 2
TGME49_266120	thioredoxin-dependent peroxidase TPX1/2	37.218	Down	HMM: MLPLCASSQMYLGQECLSCPVLPRLCLATCLGA, NN: MLPLCASSQMYLGQECLSCPVLPRLCLAT	0	outlier, PM - peripheral 2
TGME49_289970	hypothetical protein	24.448	Down	null	0	outlier, PM - peripheral 2
TGME49_216190	hypothetical protein	208.56	Up	null	0	outlier, tubulin cytoskeleton
TGME49_208550	hypothetical protein	32.144	Down	null	1	outlier,PM - peripheral 2
TGME49_205330	hypothetical protein	35.281	Down	null	8	PM - integral
TGME49_209800	formate/nitrite transporter protein	44.289	Up	null	6	PM - integral
TGME49_215450	aquaporin 1	28.115	Up	null	6	PM - integral
TGME49_230430	vesicle-associated membrane protein, putative	24.959	Down	HMM: MPLIYALAARGSVVLAE, NN: MPLIYALAARGSVVLAE	3	PM - integral
TGME49_232120	hypothetical protein	222.552	Down	null	10	PM - integral
TGME49_232830	vacuolar proton translocating ATPase subunit A, putative	101.076	Down	HMM: MTTLRSEPMLRGTLVLPSALPLAHGC, NN: MTTLRSEPMLRGTLVLPSALPLAHGC	6	PM - integral
TGME49_235750	ULK kinase	41.223	Down	null	0	PM - integral
TGME49_239020	ABC transporter transmembrane region domain-containing protein	151.635	Up	null	9	PM - integral
TGME49_240740	Sec1 family protein	71.938	Up	null	0	PM - integral
TGME49_257520	synaptobrevin protein	28.935	Down	HMM: MKGSTSTALPATPGVAGTVSVAGSAVSAS, NN: MKGSTSTALPATPGVAG	1	PM - integral
TGME49_259200	Na+/H+ exchanger NHE1	248.187	Up	null	12	PM - integral
TGME49_260310	ATP-binding cassette transporter ABC.B1	144.527	Down	null	7	PM - integral
TGME49_265040	hypothetical protein	30.615	Up	null	1	PM - integral
TGME49_272650	3'5'-cyclic nucleotide phosphodiesterase domain-containing protein	141.301	Down	null	6	PM - integral
TGME49_281910	hypothetical protein	42.399	Down	null	1	PM - integral
TGME49_290580	ATP-binding cassette G family transporter ABCG89	89.089	Up	null	7	PM - integral
TGME49_305260	hypothetical protein	64.078	Down	null	0	PM - integral
TGME49_313680	hypothetical protein	52.14	Down	null	6	PM - integral
TGME49_318150	transporter, major facilitator family protein	65.108	Down	null	8	PM - integral
TGME49_214190	SAG-related sequence SRS46	38.536	Up	HMM: MRVSSSVSFLATAGSTLLLSGLFAEAA, NN: MRVSSSVSFLATAGSTLLLSGLFAEAA	0	PM - peripheral 1
TGME49_222370	SAG-related sequence SRS13	92.468	Up	null	1	PM - peripheral 1
TGME49_226860	SAG-related sequence SRS67	23.135	Down	HMM: MAFRKPLFSGRQWVALMCVFAAVGGK, NN: MAFRKPLFSGRQWVALMCVFAAVGGK	0	PM - peripheral 1
TGME49_252390	hypothetical protein	11.332	Down	HMM: MRGNPFASKTATQLSPLGMVQRFSEMRAAGSFTFLAWFAVFLWCFSVSCI, NN: MRGNPFASKTATQLSPLGMVQRFSEMRAAGSFTFLAWFAVFLWCFSVSCI	1	PM - peripheral 1
TGME49_281930	SAG-related sequence SRS39	33.924	Down	HMM: MVHSWARAFMKRGVLAALAAVCIAARVSGT, NN: MVHSWARAFMKRGVLAALAAVCIAARVSGT	0	PM - peripheral 1
TGME49_319350	SAG-related sequence SRS17B	39.375	Up	HMM: MASQKVLVCLTVAGCLLATFHTFCASVSAASAG, NN: MASQKVLVCLTVAGCLLAT	2	PM - peripheral 1
TGME49_320200	SAG-related sequence SRS16A	41.589	Down	HMM: MARKGSTQRRRGGFETKPRELIAFCMVGALLLSSGQAV, NN: MARKGSTQRRRGGFETKPRELIAFCMVGALLLSSGQAVAR	1	PM - peripheral 1
TGME49_321480	SAG-related sequence SRS12B	40.534	Down	HMM: MARTGKVQQRRGGLRSGARKLVAVCLSGVVLLSGGSVVAT, NN: MARTGKVQQRRGGLRSGARKLVAVCLSGVVLLSGGSVVATE	1	PM - peripheral 1
TGME49_245730	phosphatidylinositol-4-phosphate 5-Kinase	232.508	Down	null	0	PM - peripheral 2
TGME49_314780	myosin G	227.27	Down	null	0	PM - peripheral 2
TGME49_211150	hypothetical protein	270.822	Up	null	0	PM - peripheral 2, outlier
TGME49_217570	ribosomal protein RPS27	16.953	Up	null	0	PM - peripheral 2, outlier
TGME49_221390	hypothetical protein	96.462	Down	null	0	PM - peripheral 2, outlier
TGME49_221630	hypothetical protein	209.947	Down	null	0	PM - peripheral 2, outlier
TGME49_236930	hypothetical protein	610.194	Up	null	0	PM - peripheral 2, outlier
TGME49_247230	centrin	19.342	Down	null	0	PM - peripheral 2, outlier
TGME49_258780	OTU family cysteine protease	40.701	Down	null	0	PM - peripheral 2, outlier
TGME49_268780	hypothetical protein	775.551	Up	HMM: MRLGHRDTMTLLGLLHVLLFLFFAVVLVLPILLSL, NN: MRLGHRDTMTLLGLLHVLLFLFFAVVLVLPILLSL	1	PM - peripheral 2, outlier
TGME49_288920	ATP-binding cassette G family transporter ABCG96	112.464	Up	null	7	PM - peripheral 2, outlier
TGME49_310450	myosin heavy chain, putative	148.061	Down	null	0	PM - peripheral 2, outlier
TGME49_201630	protein phosphatase 2C domain-containing protein	41.456	Down	HMM: MRGVFTIAAAVLLSLSLSPTGSHAV, NN: MRGVFTIAAAVLLSLSLSPTGSHAV	0	rhoptries 1
TGME49_203990	rhoptry protein ROP12	25.482	Down	HMM: MARVLPCVFLVAYLSCFLLAGELTHTTAL, NN: MARVLPCVFLVAYLSCFLLAG	1	rhoptries 1
TGME49_209170	hypothetical protein	45.478	Down	HMM: MAGSSSQPLDAHVYVPRSGFFSRVLVRSLLTLVTLLVCLTPSPSDAA, NN: MAGSSSQPLDAHVYVPRSGFFSRVLVRSLLTLVTLLVCLTPSPSDAA	0	rhoptries 1
TGME49_211290	rhoptry protein ROP15	36.587	Down	HMM: MLKTTPAFFLFLTWMFPRCDGF, NN: MLKTTPAFFLFLTWMFPRCDGF	0	rhoptries 1
TGME49_214080	toxofilin	26.788	Down	HMM: MAQYKSRPLAAVLLLITVGSLLTASESV, NN: MAQYKSRPLAAVLLLITVGSLLTA	1	rhoptries 1
TGME49_225200	hypothetical protein	179.692	Down	HMM: MGLFAFLSRRCLLLLFFAVLLSGEDWIRPTLAA, NN: MGLFAFLSRRCLLLLFFAVLLSGE	0	rhoptries 1
TGME49_237180	hypothetical protein	29.155	Down	HMM: MRVLFWVLLAASISLARGE, NN: MRVLFWVLLAASISLARGE	0	rhoptries 1
TGME49_252500	polo kinase	76.893	Down	HMM: MRRSRSKYHVGTFVTGSAVQRLTLVGMYSAVWVTSAHSS, NN: MRRSRSKYHVGTFVTGSAVQRLTLVGMYSAVWVTSAHSS	0	rhoptries 1
TGME49_258230	rhoptry kinase family protein ROP20	61.205	Down	HMM: MRLDAVYYLAQMASHRIPRCQATFRHFICWFLIFAAFAVSDFSNVHGS, NN: MRLDAVYYLAQMASHRIPRCQATFRHFICWFLIFAAFAV	1	rhoptries 1
TGME49_277720	GDA1/CD39 (nucleoside phosphatase) family protein	92.537	Down	HMM: MAEREAEDRLSSRRSPPFRVFSFSLLLLLFSKTTWEEAAAV, NN: MAEREAEDRLSSRRSPPFRVFSFSLLLLLFSKTTWEEAAAV	0	rhoptries 1
TGME49_294560	rhoptry kinase family protein ROP37 (incomplete catalytic triad)	83.583	Down	HMM: MGRAISFVLLLSALLPEGRGS, NN: MGRAISFVLLLSALLPEGRGS	0	rhoptries 1
TGME49_295125	rhoptry protein ROP4	42.4	Up	HMM: MGHPTSFGQPSCLVWLAAAFLVLGLCLVQQGAGR, NN: MGHPTSFGQPSCLVWLAAAFLVLGLCLVQQGAGR	1	rhoptries 1
TGME49_297960	rhoptry neck protein RON6	238.613	Down	HMM: MGGRATTSGARSLALPLLALFKPSFVLLFFLSSAVSSGLAG, NN: MGGRATTSGARSLALPLLALFKPSFVLLFFLSSAVSSGLAG	1	rhoptries 1
TGME49_305270	hypothetical protein	82.314	Down	HMM: MKPFAPILLLLALFPFSGSGVSF, NN: MKPFAPILLLLALFPFSGSG	0	rhoptries 1
TGME49_310010	rhoptry neck protein RON1	127.432	Down	HMM: MARSSRAAPSGAFAHGVAKASFTWISGMKTPFGCVFFFCLIALWGFSAAL, NN: MARSSRAAPSGAFAHGVAKASFTWISGMKTPFGCVFFFCLIALWGFSAAL	1	rhoptries 1
TGME49_315490	rhoptry protein ROP10	60.911	Down	HMM: MGRPRWPLPSMFFLSLLCVSEKRFSVSGL, NN: MGRPRWPLPSMFFLSLLCVSEKRFSVSGL	0	rhoptries 1
TGME49_225330	hypothetical protein	73.862	Down	HMM: MASIPLGLASSFLFCLLSEAVSL, NN: MASIPLGLASSFLFCLLSEAVSL	0	rhoptries 1, outlier
TGME49_318525	hypothetical protein	188.813	Down	HMM: MASLWFLSSGISQSADGGCSALRKKTVYALVIVCFFSAAVWPRIEAT, NN: MASLWFLSSGISQSADGGCSALRKKTVYALVIVCFFSAAVWPRIEAT	0	rhoptries 1, outlier
TGME49_243690	hypothetical protein	44.602	Down	null	1	rhoptries 2
TGME49_246550	aspartyl protease ASP3	69.155	Down	HMM: MEGRTTAGRATPAGFWLFSCCLASLLWSANAL, NN: MEGRTTAGRATPAGFWLFSCCLASLLWSANAL	1	rhoptries 2
TGME49_261750	rhoptry neck protein RON10	91.369	Down	null	0	rhoptries 2
TGME49_271270	hypothetical protein	93.1	Down	null	1	rhoptries 2
TGME49_280670	hypothetical protein	38.909	Down	HMM: MPDGNSIVGGIAVLAAILATGSVAV, NN: MPDGNSIVGGIAVLAAILATGSVAV	10	rhoptries 2
TGME49_294790	hypothetical protein	37.699	Down	null	0	rhoptries 2
TGME49_305250	hypothetical protein	32.697	Down	null	6	rhoptries 2
TGME49_306895	hypothetical protein	18.252	Down	null	4	rhoptries 2
TGME49_312150	hypothetical protein	60.546	Down	null	1	rhoptries 2
TGME49_315220	rhoptry protein ROP14	121.909	Down	null	11	rhoptries 2
TGME49_221620	beta-tubulin, putative	50.036	Down	null	0	tubulin cytoskeleton
TGME49_286590	microtubule associated protein SPM2	39.612	Down	null	0	tubulin cytoskeleton
TGME49_200290	rhomboid protease ROM1	32.866	Down	null	6
TGME49_200295	hypothetical protein	25.905	Down	null	0
TGME49_200595	hypothetical protein	13.683	Up	null	0
TGME49_200700	Toxoplasma gondii family C protein	14.783	Up	null	1
TGME49_201830	ribosomal protein L37	55.876	Down	null	0
TGME49_202010	hypothetical protein	91.158	Up	null	0
TGME49_202030	hypothetical protein	205.563	Up	null	0
TGME49_202040	hypothetical protein	112.087	Down	null	0
TGME49_202050	hypothetical protein	24.18	Down	HMM: MTPPLGPIRMGRSLTLGLVSSFLVGCCFGP, NN: MTPPLGPIRMGRSLTLGLVSSFLVGCCFGP	1
TGME49_202180	hypothetical protein	155.719	Up	null	0
TGME49_202190	hypothetical protein	111.648	Up	null	0
TGME49_202280	WD domain, G-beta repeat-containing protein	195.225	Up	null	0
TGME49_202290	membrane protein, putative	39.772	Up	null	4
TGME49_202430	hypothetical protein	62.334	Up	null	0
TGME49_202450	hypothetical protein	22.609	Down	null	1
TGME49_202490	AP2 domain transcription factor AP2VIIa-7	331.833	Up	HMM: MGSVKVAAVSPPGVGRHRTASGFALLPSVPSSPSSFAS, NN: MGSVKVAAVSPPGVGRHRTASGFALLPSVPSS	0
TGME49_202500	GAPM1a	33.534	Down	null	6
TGME49_202568	hypothetical protein	17.49	Down	null	0
TGME49_202900	zinc finger (CCCH type) motif-containing protein	137.328	Up	null	0
TGME49_202920	p-aminobenzoic acid synthase	107.111	Up	null	0
TGME49_203200	hypothetical protein	158.787	Up	HMM: MKCSLSEASSAFVEPHTLSFLLLRPCSWCSSSPASPALCLSSFLAEAA, NN: MKCSLSEASSAFVEPHTLSFLLLRPCSWCS	0
TGME49_203280	hypothetical protein	22.535	Down	null	0
TGME49_203358	hypothetical protein	42.999	Down	null	0
TGME49_203875	hypothetical protein	12.674	Down	null	0
TGME49_203900	hypothetical protein	112.392	Down	null	0
TGME49_204330	hypothetical protein	29.511	Down	null	0
TGME49_204395	hypothetical protein	12.502	Down	null	0
TGME49_204540	DUF367 domain-containing protein	63.641	Up	null	0
TGME49_204870	hypothetical protein	71.713	Down	null	0
TGME49_205170	hypothetical protein	26.013	Down	null	0
TGME49_205290	serine/threonine specific protein phosphatase	57.918	Down	null	0
TGME49_205370	hypothetical protein	78.731	Down	null	4
TGME49_205480	IMC subcompartment protein ISP4	19.382	Down	null	0
TGME49_205490	integral membrane protein, putative	66.253	Down	null	11
TGME49_205562	hypothetical protein	627.139	Up	null	0
TGME49_205615	hypothetical protein	374.982	Up	null	0
TGME49_205670	SF-assemblin/beta giardin protein	30.051	Down	null	0
TGME49_206290	hypothetical protein	47.924	Up	HMM: MAPSLIQSVVSGQTAWTVARKTMVCHGKTRQAMSMSRPHGAARLLSVTALIAVMALSS, NN: MAPSLIQSVVSGQTAWTVAR	1
TGME49_206330	PHD-finger domain-containing protein	116.221	Down	null	0
TGME49_206570	kinesin, putative	77.805	Up	null	0
TGME49_206640	hypothetical protein	144.096	Down	null	0
TGME49_206710	hypothetical protein	77.142	Down	null	0
TGME49_207130	SAG-related sequence SRS49A	38.615	Up	HMM: MAAAHSAATCRNSACRSSLLRERRTRYSSTRIVSSRRFQSFCLLALLTRNFMQQPVAKAS, NN: MAAAHSAATCRNSACR	0
TGME49_207200	hypothetical protein	175.628	Up	null	0
TGME49_207665	kinesin motor domain-containing protein	92.87	Up	null	0
TGME49_207865	GCC2 and GCC3 domain-containing protein	306.176	Up	null	0
TGME49_207900	transcription initiation factor TFIIIB	88.047	Down	null	0
TGME49_207955	hypothetical protein	16.288	Down	HMM: MKRLLLVVSVVACLVPTTLSL, NN: MKRLLLVVSVVACLVPTTLSL	0
TGME49_208040	aldo-keto reductase	156.165	Up	null	1
TGME49_209200	hypothetical protein	82.053	Down	null	0
TGME49_209490	hypothetical protein	56.765	Down	HMM: MAWILKGEFEFLVSSLAERLDIAKCRGL, NN: MAWILKGEFEFLVSSLAE	0
TGME49_209610	oocyst wall protein OWP2	50.7	Down	HMM: MPTICSKIICALSVLLATTAH, NN: MPTICSKIICALSVLLATTAHVPGM	0
TGME49_209630	hypothetical protein	50.93	Down	null	0
TGME49_209755	hypothetical protein	140.48	Up	HMM: MKLFFKLVLAGVSSIFAAQCLAGAVAA, NN: MKLFFKLVLAGVSSIFAAQCLAGAVAAR	0
TGME49_210235	hypothetical protein	85.713	Up	null	2
TGME49_210245	hypothetical protein	285.471	Up	null	4
TGME49_210255	hypothetical protein	12.771	Up	null	1
TGME49_210440	polynucleotide adenylyltransferase	92.11	Up	null	0
TGME49_210470	hypothetical protein	72.202	Up	null	0
TGME49_210478	hypothetical protein	294.545	Up	null	0
TGME49_210490	hypothetical protein	101.585	Up	HMM: MNCSRRQMLIRITGRRPTGSSSHSALLTPSLFSAVPFPVAPTGMISALGHASLFSRVSATQAT, NN: MNCSRRQMLIRITGRRPTGSSSHSALLTPSLFSAVPFPVAPT	0
TGME49_210760	glutamine amidotransferase-related, putative	56.709	Down	null	0
TGME49_211280	hypothetical protein	106.73	Down	null	0
TGME49_211370	tetratricopeptide repeat-containing protein	112.408	Up	null	0
TGME49_211385	hypothetical protein	25.715	Up	null	0
TGME49_211660	hypothetical protein	33.301	Down	HMM: MRPTGGRSRSASMRWSTLEATGGNSLFAFLSLFSGVCNLS, NN: MRPTGGRSRSASMRWSTLEATGGNSLFAFLSLFSGVCNLSCE	0
TGME49_212240	beta-1 tubulin, putative	50.051	Down	null	0
TGME49_212280	hypothetical protein	25.229	Down	HMM: MPRYCQQQIVCLVCPLCLEFLTTADSM, NN: MPRYCQQQIVCLVCPLCLEFLTTADSM	0
TGME49_212740	aromatic amino acid hydrolase AAH2	62.395	Up	HMM: MSLSTALRAHVTLRGLLSRACSAV, NN: MSLSTALRAHVTLRGLLSRACSA	0
TGME49_212760	hypothetical protein	8.088	Up	null	0
TGME49_212770	hypothetical protein	99.777	Down	null	0
TGME49_212810	hypothetical protein	550.225	Up	null	0
TGME49_213325	TBC domain-containing protein	290.874	Up	null	2
TGME49_213480	hypothetical protein	119.88	Up	null	0
TGME49_213810	iron-sulfur cluster protein ISCA	53.009	Down	null	0
TGME49_213820	hypothetical protein	94.729	Up	null	0
TGME49_213880	hypothetical protein	21.329	Up	null	0
TGME49_213970	ribosomal RNA small subunit methyltransferase B, putative	45.252	Down	null	0
TGME49_214070	hypothetical protein	15.454	Down	null	0
TGME49_214380	hypothetical protein	15.532	Down	HMM: MDRYSCMCLLLLRERSLFATLLFLLSYWIPFFSLRVSPLQFFLTPFVSAV, NN: MDRYSCMCLLLLRERSLFATLLFLLSYWIPFFSL	2
TGME49_215055	hypothetical protein	26.838	Up	HMM: MGGTSCGLPFSLFARLWIFLSGLSS, NN: MGGTSCGLPFSLFARLWIFLSGLSS	0
TGME49_215130	adaptor-related protein complex 3, sigma 2 subunit	18.003	Up	null	0
TGME49_215195	tetratricopeptide repeat-containing protein	104.033	Up	null	0
TGME49_215425	hypothetical protein	12.612	Up	HMM: MRFQHVRALSVLVLEPASPRSASCR, NN: MRFQHVRALSVLVLEPASPRSASCR	0
TGME49_215480	Adenosine/AMP deaminase domain-containing protein	56.826	Up	null	0
TGME49_215540	hypothetical protein	19.418	Up	HMM: MLITLSGAGASWLLPSLLAVGAGKTIAGGTAA, NN: MLITLSGAGASWLLPSLLAVGAGK	0
TGME49_215660	hypothetical protein	69.605	Up	HMM: MKTMAKASRVLHFLSASRPCCHSPLTSLRSLSLLVSIPSRYSSSSFSSLFSPSLPF, NN: MKTMAKASRVLHFLSAS	4
TGME49_215930	mediator complex subunit MED21	17.067	Down	null	0
TGME49_216140	tetratricopeptide repeat-containing protein	61.166	Down	null	0
TGME49_216500	tRNA synthetase, putative	280.719	Up	HMM: MTLCRRFSWSILYVFLTAHFFLFVPSAFLA, NN: MTLCRRFSWSILYVFLTAHFFLFVPSA	1
TGME49_216610	ribosomal RNA large subunit methyltransferase J protein	146.503	Up	null	0
TGME49_217170	hypothetical protein	20.121	Up	HMM: MLPKIAKVPYFPQVVLSGASPLAARAS, NN: MLPKIAKVPYFPQVVLSGASPLAARAS	0
TGME49_217450	general transcription factor IIH polypeptide 5 GTF2H5	22.906	Down	null	0
TGME49_217470	hypothetical protein	160.403	Down	null	0
TGME49_217790	S1 RNA binding domain-containing protein	268.147	Up	HMM: MKSRRRPSSSRLLVGRSSFSSSLALDKASGG, NN: MKSRRRPSSSRLLVGRSSFSSSLAL	1
TGME49_217860	hypothetical protein	328.536	Up	null	0
TGME49_218195	hypothetical protein	20.343	Down	null	0
TGME49_218370	hypothetical protein	34.204	Up	null	0
TGME49_218390	hypothetical protein	31.656	Up	null	0
TGME49_218400	NEK kinase	319.73	Up	null	0
TGME49_218470	protein disulfide-isomerase, putative	96.627	Up	HMM: MVVFRLTKRPTACTCVFLIYLFTTFIGADPGAAAG, NN: MVVFRLTKRPTACTCVFLIYLFTTFIGAD	0
TGME49_218850	ribosomal protein RPS9	30.284	Up	HMM: MALERWCRGVRCSLPSWAVMCLAYFLCGPAVGTAF, NN: MALERWCRGVRCSLPSWAVMCLAYFLCGPAVGTAF	1
TGME49_218890	hypothetical protein	107.139	Up	null	0
TGME49_218910	hypothetical protein	81.615	Down	HMM: MAGWAIGDFNYTMLLQLVDQEISVFDYLKANYVFLALIAVSVLLLALWLFLCLPKVFCR, NN: MAGWAIGDFNYTMLLQLVDQEISVFDYLKANYVFLALIAVSVLLLALWLFLCLPKVFCR	5
TGME49_219125	hypothetical protein	11.48	Up	null	0
TGME49_219218	hypothetical protein	175.382	Up	null	0
TGME49_219485	hypothetical protein	255.029	Up	null	0
TGME49_219610	hypothetical protein	23.164	Down	null	0
TGME49_219828	HMG (high mobility group) box domain-containing protein	11.381	Up	null	0
TGME49_220060	hypothetical protein	12.961	Up	null	0
TGME49_220120	hypothetical protein	32.891	Up	null	0
TGME49_220420	3'5'-cyclic nucleotide phosphodiesterase domain-containing protein	116.124	Down	null	5
TGME49_220460	SNF7 family protein	29.478	Down	null	0
TGME49_220525	hypothetical protein	12.13	Down	null	1
TGME49_220650	hypothetical protein	34.867	Up	null	0
TGME49_220940	ribosomal RNA methyltransferase (FtsJ) family protein	52.15	Down	null	0
TGME49_221250	hypothetical protein	114.437	Down	null	0
TGME49_221260	Class-II DAHP synthetase family protein	67.321	Up	null	0
TGME49_221310	aminopeptidase N protein	121.298	Up	null	0
TGME49_221600	hypothetical protein	97.452	Up	null	0
TGME49_221830	subtilisin SUB12	209.633	Up	null	0
TGME49_221990	hypothetical protein	62.029	Down	null	0
TGME49_222060	hypothetical protein	103.67	Down	null	2
TGME49_222250	hypothetical protein	167.958	Up	HMM: MSWKLINCVSGEVWALPPSLLSPPSPAA, NN: MSWKLINCVSGEVWAL	0
TGME49_222280	hypothetical protein	27.317	Down	null	0
TGME49_222330	hypothetical protein	255.824	Down	null	0
TGME49_222420	hypothetical protein	63.288	Up	null	5
TGME49_222930	hypothetical protein	34.501	Down	null	1
TGME49_223420	DnaJ domain-containing protein	42.196	Up	HMM: MYTHFVAGAAWCQLVFLVHRAPDFFSVLSALVFSGRQPVAPD, NN: MYTHFVAGAAWCQLVFLVHRA	0
TGME49_223430	hypothetical protein	80.442	Up	HMM: MMRPTGGPGLLPLQWLLLVVAIGLTLGG, NN: MMRPTGGPGLLPLQWLLLVVAIGLTLGG	1
TGME49_223520	EF hand domain-containing protein	81.553	Down	HMM: MRLLTNCLALLTWARVPKPGVLLMGVAVLSTVAEAL, NN: MRLLTNCLALLTWARVPKPGVLLMGVAVLSTVAEAL	8
TGME49_223630	hypothetical protein	51.093	Down	null	0
TGME49_223700	F5/8 type C domain-containing protein	170.533	Down	HMM: MRNHWCGILLLLGCVVHCSAQ, NN: MRNHWCGILLLLGCVVHCSAQ	0
TGME49_223810	hypothetical protein	136.764	Down	null	10
TGME49_224080	Kazal-type serine protease inhibitor domain-containing protein	214.942	Up	null	0
TGME49_224170	SAG-related sequence SRS60A	32.901	Up	HMM: MARVCRVAVGVRQQLAASVVAGLLVTLLTDVDAS, NN: MARVCRVAVGVRQQLAASVVAGLLVTLLTDVDAS	0
TGME49_224180	hypothetical protein	142.716	Up	null	0
TGME49_224235	translation initiation factor IF-3 protein	61.439	Up	HMM: MGMQTASSMWPLIFHPSSVSA, NN: MGMQTASSMWPLIFHPSSVSA	0
TGME49_224510	hypothetical protein	226.329	Up	null	0
TGME49_224570	hypothetical protein	63.182	Up	null	8
TGME49_224610	GYF domain-containing protein	150.949	Up	null	0
TGME49_224710	hypothetical protein	56.001	Down	null	1
TGME49_224880	kinesin motor domain-containing protein	218.975	Down	null	0
TGME49_225090	hypothetical protein	266.816	Up	null	0
TGME49_225105	hypothetical protein	110.76	Down	null	2
TGME49_225108	SNF7 family protein	93.977	Down	HMM: MRHALVASCVILCLLSAFLSSLYAA, NN: MRHALVASCVILCLLSAFLSSLYAA	1
TGME49_225130	hypothetical protein	148.06	Up	HMM: MAARRARGLPSFHPLRGSFSRCLTRRTVSPVSLSRSSLCSSALASSFFARAPSLSS, NN: MAARRARGLPSFHPLRGSFSR	0
TGME49_225220	SCP family extracellular subfamily protein	89.896	Down	HMM: MAGRTTRARLFLIFVAFVFSARASSASAA, NN: MAGRTTRARLFLIFVAFVFSARASSASAA	0
TGME49_225300	hypothetical protein	32.672	Down	null	0
TGME49_225360	hypothetical protein	82.31	Up	null	0
TGME49_225370	hypothetical protein	95.708	Up	null	0
TGME49_225490	calcium-dependent protein kinase CDPK2	79.132	Down	null	0
TGME49_225530	metal cation transporter, ZIP family protein	74.701	Up	null	8
TGME49_226100	haloacid dehalogenase family hydrolase domain-containing protein	96.902	Up	null	3
TGME49_226515	hypothetical protein	50.718	Down	null	0
TGME49_226820	hypothetical protein	18.274	Down	null	0
TGME49_226850	TBC domain-containing protein	119.653	Down	null	0
TGME49_226925	hypothetical protein	17.688	Down	null	0
TGME49_227050	ATPase/histidine kinase/DNA gyrase B/HSP90 domain-containing protein	113.196	Down	null	0
TGME49_227090	aspartokinase	51.498	Down	null	0
TGME49_227440	WD domain, G-beta repeat-containing protein	50.566	Down	null	0
TGME49_227630	hypothetical protein	10.35	Down	HMM: MSPAVRQPQRLPGYVCALAKMTTVKTTNLQRLLASSLVLQGLVTVLAWAPAQ, NN: MSPAVRQPQRLPGYVCALAKMTTVKTTNLQRLLASSLVLQGLVTVLAWAPAQ	0
TGME49_227930	hypothetical protein	169.763	Up	HMM: MNSFQDFAFLLAVPAVGGE, NN: MNSFQDFAFLLAVPAVGGE	0
TGME49_228110	hypothetical protein	13.972	Down	HMM: MGLHHLAASSAAVLLAGGTAA, NN: MGLHHLAASSAAVLLAGGTAA	3
TGME49_228145	hypothetical protein	17.339	Down	null	0
TGME49_228480	hypothetical protein	17.046	Up	null	0
TGME49_229280	hypothetical protein	78.401	Down	null	0
TGME49_229330	Cof family hydrolase subfamily protein	36.385	Down	null	0
TGME49_229340	hypothetical protein	205.693	Up	null	0
TGME49_229370	AP2 domain transcription factor AP2VIII-1	218.457	Up	null	0
TGME49_230130	hypothetical protein	15.924	Up	HMM: MSKWFLNSNTPKSHALSLFIVVRTRQSE, NN: MSKWFLNSNTPKSHALSLFIVVRTRQSE	0
TGME49_230710	cell division protein CDC48	143.883	Up	null	0
TGME49_230830	ATPase family associated with various cellular activities (AAA) domain-containing protein	540.153	Up	null	0
TGME49_231030	hypothetical protein	95.499	Up	null	6
TGME49_231280	WD domain, G-beta repeat-containing protein	89.347	Up	null	0
TGME49_231360	hypothetical protein	92.433	Up	null	2
TGME49_231991	hypothetical protein	16.998	Down	null	1
TGME49_231996	hypothetical protein	20.035	Up	null	0
TGME49_232035	hypothetical protein	15.234	Down	null	0
TGME49_232040	hypothetical protein	77.452	Down	null	2
TGME49_232320	hypothetical protein	159.761	Down	HMM: MAGDLVSFLSAAGDEILILIHLFLHSSQTS, NN: MAGDLVSFLSAAGDEILILIHLFLHSSQTS	0
TGME49_232510	hypothetical protein	133.032	Up	null	0
TGME49_232960	oxidoreductase, 2OG-Fe(II) oxygenase family protein	29.932	Down	null	0
TGME49_233370	hypothetical protein	23.833	Down	HMM: MKVFLPATVFCLSSGILLARAE, NN: MKVFLPATVFCLSSGILLARAE	1
TGME49_233405	hypothetical protein	31.606	Down	null	0
TGME49_233510	hypothetical protein	27.762	Up	null	0
TGME49_233770	calcium-translocating P-type ATPase, PMCA-type protein	158.076	Down	null	8
TGME49_233830	hypothetical protein	41.655	Up	null	0
TGME49_233920	zinc finger, C3HC4 type (RING finger) domain-containing protein	93.579	Down	null	0
TGME49_233950	hypothetical protein	76.067	Up	null	0
TGME49_233960	hypothetical protein	345.257	Up	null	0
TGME49_234200	hypothetical protein	101.348	Up	null	0
TGME49_234260	hypothetical protein	12.006	Down	null	0
TGME49_234940	hypothetical protein	39.788	Down	HMM: MARLVRLSGAALLVFISVAVTSF, NN: MARLVRLSGAALLVFISVAVTSF	0
TGME49_235000	phosphorylase family protein	80.087	Down	null	0
TGME49_235180	hypothetical protein	103.643	Down	null	0
TGME49_235370	hypothetical protein	83.936	Down	null	0
TGME49_235460	hypothetical protein	21.119	Down	null	0
TGME49_235580	hypothetical protein	79.102	Up	null	0
TGME49_235860	subtilisin SUB11	130.721	Up	null	0
TGME49_236060	hypothetical protein	53.783	Down	null	0
TGME49_236120	hypothetical protein	32.072	Up	HMM: MERRRLLCLLGFLPASAVLLLSEFGSFLFGAAVFAG, NN: MERRRLLCLLGFLPASAV	1
TGME49_236220	PCI domain-containing protein	75.649	Up	HMM: MFCADERRRLGVASLLLSSFALRSQLSSLRLSLLPFLVSSL, NN: MFCADERRRLGVASLLLSSFALRSQLSSLRLSLLPFLVSSL	3
TGME49_236280	hypothetical protein	52.929	Up	null	0
TGME49_236530	DUF298 domain-containing protein	35.816	Up	null	0
TGME49_236595	ankyrin repeat-containing protein	34.189	Up	null	0
TGME49_236870	hypothetical protein	23.791	Down	HMM: MAAASSFLWPPVRRQQLPQRLRPFLHKVTFFTGCVVSLIFQVGVAA, NN: MAAASSFLWPPVRRQQLPQRLRPFLHKVTFFTGCVVSLIFQVGVAA	2
TGME49_237170	hypothetical protein	78.77	Up	null	0
TGME49_237195	hypothetical protein	99.915	Down	null	0
TGME49_237270	hypothetical protein	22.076	Down	null	0
TGME49_237425	AP2 domain transcription factor AP2X-6	477.647	Up	null	0
TGME49_237490	centrin family protein	26.958	Up	null	0
TGME49_237800	dense granule protein GRA11	49.341	Up	HMM: MSHRMASRSRLLFAAFCAGGVLLGA, NN: MSHRMASRSRLLFAAFCAGGVLLGA	2
TGME49_238060	EF hand domain-containing protein	29.809	Down	null	0
TGME49_238140	hypothetical protein	93.807	Up	null	0
TGME49_238170	hypothetical protein	165.149	Down	HMM: MLRTFSSSAASLAAPSKSQ, NN: MLRTFSSSAASLAA	0
TGME49_238200	alpha/beta hydrolase fold domain-containing protein	86.244	Up	null	1
TGME49_238260	hypothetical protein	42.913	Down	null	0
TGME49_238270	hypothetical protein	15.49	Down	null	0
TGME49_238870	hypothetical protein	48.924	Up	HMM: MRPSSSEERPSVSPTASAASSAPFALSAADRRLLLLSSATVISQRTPSHLS, NN: MRPSSSEERPSVSPTASAASSAPFALSAADRRLLLLSSATVISQ	0
TGME49_238930	hypothetical protein	175.027	Up	null	0
TGME49_238960	EF hand domain-containing protein	31.486	Up	null	0
TGME49_239270	hypothetical protein	144.709	Up	null	0
TGME49_239340	hypothetical protein	211.262	Up	null	1
TGME49_239475	hypothetical protein	236.336	Up	null	0
TGME49_239510	hypothetical protein	37.874	Up	null	0
TGME49_239580	hypothetical protein	244.219	Up	null	0
TGME49_239795	hypothetical protein	29.458	Down	null	0
TGME49_239830	TBC domain-containing protein	257.012	Down	null	0
TGME49_239880	hypothetical protein	134.62	Up	HMM: MAAMKVGGQKACLLVSAALALLCMTGLPA, NN: MAAMKVGGQKACLLVSAALALLCMTGLPA	1
TGME49_240240	subtilisin SUB5	110.311	Up	null	0
TGME49_240243	hypothetical protein	41.04	Up	HMM: MTAHSVRGVSGALLGRRPSLASFHPLVFPHCFSH, NN: MTAHSVRGVSGA	4
TGME49_240290	hypothetical protein	25.071	Up	null	0
TGME49_240490	hypothetical protein	15.654	Up	null	0
TGME49_240580	hypothetical protein	30.26	Up	HMM: MQMATHCATMCAAAIAVSRVARLE, NN: MQMATHCATMCAAAIAVSRVARLE	4
TGME49_240630	ULK kinase	55.715	Down	null	0
TGME49_240755	hypothetical protein	10.524	Up	null	0
TGME49_240770	cytochrome b5 family heme/steroid binding domain-containing protein	60.398	Up	null	3
TGME49_241140	DEAD/DEAH box helicase domain-containing protein	156.806	Up	HMM: MRSAALLSRLRVPLRSISVVFLFSFASLAVQTSFCA, NN: MRSAALLSRLRVPLRSISVVFLFSFASLAV	0
TGME49_241165	hypothetical protein	33.641	Down	null	0
TGME49_242055	DEAD/DEAH box helicase domain-containing protein	479.736	Up	null	0
TGME49_242415	histone lysine-specific demethylase	413.596	Up	null	0
TGME49_242610	WD domain, G-beta repeat-containing protein	62.249	Up	null	0
TGME49_242625	ATPase family associated with various cellular activities (AAA) subfamily protein	976.079	Up	HMM: MASESSSVAADIAAALLPLVRAL, NN: MASESSSVAADIAAALLPLVRAL	0
TGME49_242750	hypothetical protein	445.173	Up	null	0
TGME49_242760	hypothetical protein	42.167	Up	HMM: MFHLAWVVSREIPFCFVSSVSATLPLALLPVKTLCQ, NN: MFHLAWVVSREIPFCFVSSVSAT	0
TGME49_242870	histone lysine methyltransferase, SET, putative	62.209	Up	null	0
TGME49_243265	protamine P1 protein	484.666	Up	null	0
TGME49_243298	ICE family protease (caspase) p20 domain-containing protein	220.953	Up	HMM: MLTRLAALFLGDETAPA, NN: MLTRLAALFLGDETAPAV	0
TGME49_243360	hypothetical protein	18.987	Up	null	0
TGME49_243370	hypothetical protein	18.153	Up	null	0
TGME49_243655	GMC oxidoreductase	83.686	Down	null	0
TGME49_244080	hypothetical protein	39.598	Down	HMM: MCISGRTKGEFSTMASPAPAIPFLICFSISCFLFVVSVDAR, NN: MCISGRTKGEFSTMASPAPAIPFLICFSISCFLFVVSVDARSAAGE	1
TGME49_244140	hypothetical protein	76.001	Up	HMM: MTFWRVSAGRLRLLFQPLRLALRMHFLLFSGFFFLSPFFTESL, NN: MTFWRVSAGRLRLLFQPLRLALRMHFLLFSGFFFLSPFFTESL	1
TGME49_244335	hypothetical protein	61.159	Up	HMM: MWCQGTILHTFLTAASIWLLVVALAL, NN: MWCQGTILHTFLTAASIWLLVVAL	3
TGME49_244630	hypothetical protein	160.207	Down	null	1
TGME49_244720	hypothetical protein	304.152	Down	null	0
TGME49_244840	zinc knuckle domain-containing protein	24.156	Down	null	0
TGME49_244940	hypothetical protein	8.318	Up	null	0
TGME49_245475	hypothetical protein	14.228	Down	null	0
TGME49_245480	hypothetical protein	13.377	Down	null	0
TGME49_245630	hypothetical protein	8.757	Down	HMM: MHDTTLRRGIFVTIFLFVFLGAFVTLDAY, NN: MHDTTLRRGIFVTIFLFVFLGAFVTLDAYRYMWIFLAVIFGVIVFTDCV	2
TGME49_246010	hypothetical protein	110.073	Up	null	0
TGME49_246140	hypothetical protein	111.73	Up	null	0
TGME49_247040	hypothetical protein	120.816	Up	null	0
TGME49_247340	hypothetical protein	21.016	Down	null	0
TGME49_247570	hypothetical protein	57.348	Down	null	0
TGME49_247630	membrane protein, putative	20.387	Down	null	4
TGME49_247680	hypothetical protein	190.753	Up	HMM: MRLRFSLLFSVLLPFLLPVLLSRLSLFIWLTASVGLSLSE, NN: MRLRFSLLFSVLLPFLLPVLLSRLSLFIWLTASVGLSLSE	1
TGME49_247780	hypothetical protein	28.986	Down	null	4
TGME49_247790	VRR-NUC domain-containing protein	299.721	Up	null	0
TGME49_247970	hypothetical protein	135.86	Down	HMM: MKGKKPLWTCRISLHERDCGFVHPVTVLSFLVGFLLWTTTLLAA, NN: MKGKKPLWTCRISLHERDCGFVHPVTVLSFLVGFLLWTTTLLAA	2
TGME49_248150	hypothetical protein	217.212	Up	HMM: MTTASGFVPALVGVLEGLAAAL, NN: MTTASGFVPALVGVLEGLAAAL	0
TGME49_248200	ribosomal RNA (adenine(1779)-N(6)/adenine(1780)-N(6))- dimethyltransferase, putative	53.869	Up	HMM: MPLACLLSSLSAVPHRLIRGS, NN: MPLACLLSSLSAVPHRLIRGS	0
TGME49_248560	hypothetical protein	27.735	Up	null	0
TGME49_248690	hypothetical protein	26.686	Down	null	0
TGME49_248750	hypothetical protein	114.029	Up	null	8
TGME49_248770	hypothetical protein	71.796	Up	null	0
TGME49_248900	hypothetical protein	106.058	Up	null	5
TGME49_249150	PAN domain-containing protein	208.304	Up	null	0
TGME49_249230	hypothetical protein	119.949	Down	HMM: MPWASTILILAIWSWIAIGDGQ, NN: MPWASTILILAIWSWIAIGDGQ	0
TGME49_249280	hypothetical protein	29.854	Down	HMM: MRGVSVEPQIVRVRRAKETLSAFSVGPLRLVLAFALLLGEEGSRSR, NN: MRGVSVEPQIVRVRRAKETLSAFSVGPLRLVLAF	0
TGME49_249290	hypothetical protein	76.583	Down	null	0
TGME49_249370	translation initiation factor SUI1, putative	34.683	Down	null	0
TGME49_249440	hypothetical protein	190.664	Down	null	0
TGME49_249460	WD domain, G-beta repeat-containing protein	175.539	Down	null	0
TGME49_249660	hypothetical protein	73.415	Up	null	6
TGME49_249880	hypothetical protein	162.369	Up	null	0
TGME49_249890	hypothetical protein	184.047	Up	null	0
TGME49_250050	hypothetical protein	235.536	Up	HMM: MQARLSLRPALVCLLRLCPCLLLLFSPPSSAAL, NN: MQARLSLRPALVCLLRLCPCLLLLFSPPSSAA	0
TGME49_250500	hypothetical protein	48.515	Down	HMM: MVFWRLRALLNSVLALHAVAE, NN: MVFWRLRALLNSVLALHAVAE	0
TGME49_250670	hypothetical protein	85.609	Down	HMM: MAFWRLRALFNSVLALHAVAE, NN: MAFWRLRALFNSVLALHAVAE	0
TGME49_250840	hypothetical protein	100.229	Down	null	0
TGME49_250890	3'-5' exonuclease domain-containing protein	72.191	Up	HMM: MSPCEALLSRGRSAALALSVSCSRPSAGC, NN: MSPCEALLSRGRSAALALSVSCSRPSAGC	0
TGME49_250920	tetratricopeptide repeat-containing protein	30.413	Up	null	0
TGME49_251400	hypothetical protein	71.394	Down	null	5
TGME49_251470	hypothetical protein	22.639	Down	null	0
TGME49_251570	CAAX amino terminal protease family protein	134.884	Up	HMM: MICLLVIFSLLFSSARVSYAA, NN: MICLLVIFSLLFSSARVSYAA	6
TGME49_252080	hypothetical protein	14.749	Down	null	0
TGME49_252090	hypothetical protein	7.375	Down	null	0
TGME49_252260	hypothetical protein	60.025	Up	null	0
TGME49_252860	hypothetical protein	26.838	Down	HMM: MQLPSAGKNSQGCPPSSLHFLSPITRLHCLCLVACAAPLLWEPGGCSE, NN: MQLPSAGKNSQGCPPSSLHFLSPITRLHCLCLVACAA	2
TGME49_253035	hypothetical protein	9.38	Up	null	0
TGME49_253410	hypothetical protein	50.965	Down	null	1
TGME49_253460	hypothetical protein	21.14	Down	HMM: MRLSLCLAAVAVICSKSAHAL, NN: MRLSLCLAAVAVICSKSAHAL	0
TGME49_253530	hypothetical protein	15.242	Up	null	0
TGME49_253540	hypothetical protein	79.332	Up	null	0
TGME49_253790	zinc finger (CCCH type) motif-containing protein	149.975	Up	null	0
TGME49_253850	hypothetical protein	68.347	Up	null	0
TGME49_254160	hypothetical protein	374.307	Up	null	0
TGME49_254320	hypothetical protein	56.32	Up	null	0
TGME49_254350	endo-1,3(4)-beta-glucanase	47.763	Up	null	0
TGME49_254380	ribosomal protein L11, putative	20.056	Down	HMM: MSVVGRFRLIVPAATAKPSPAIGQ, NN: MSVVGRFRLIVPAATAK	0
TGME49_254460	hypothetical protein	22.946	Down	null	0
TGME49_254485	hypothetical protein	12.824	Down	null	0
TGME49_254830	hypothetical protein	131.413	Up	null	0
TGME49_254850	myosin heavy chain, putative	54.142	Down	null	0
TGME49_254890	hypothetical protein	33.104	Up	HMM: MAARSLRVRRLCLFILAICVLRAAETV, NN: MAARSLRVRRLCLFILAICVLRAA	0
TGME49_255450	hypothetical protein	68.361	Down	null	0
TGME49_255470	hypothetical protein	126.041	Up	null	0
TGME49_255500	hypothetical protein	74.694	Down	null	0
TGME49_255715	hypothetical protein	18.361	Up	null	0
TGME49_255860	hypothetical protein	130.472	Up	null	0
TGME49_255920	GINS complex subunit Psf3, putative	41.661	Up	null	0
TGME49_256010	hypothetical protein	36.742	Up	null	0
TGME49_256100	tetratricopeptide repeat-containing protein	182.105	Down	null	0
TGME49_256920	phosphatidylinositol-4-phosphate 5-Kinase	452.124	Up	null	0
TGME49_256950	hypothetical protein	20.473	Up	HMM: MLVSPKSESLGFVFFSAFPLRAPVQVHAV, NN: MLVSPKSESLGFVFFSAFPLRAPV	0
TGME49_256960	FYVE zinc finger domain-containing protein	90.54	Up	HMM: MRRSSGVSAGSSASEARRSCVPISSSSSSSSSSSASSSLAR, NN: MRRSSGVSAGSSASEAR	0
TGME49_257000	hypothetical protein	95.263	Up	null	11
TGME49_257050	3-methyl-2-oxobutanoate hydroxymethyltransferase	104.516	Up	HMM: MLRQSCFMTPSLRRLFFALPKTAGCRGV, NN: MLRQSCFMTPSLRRLFFALPKTAGCRGV	0
TGME49_257120	sugar transporter ST1	62.826	Down	null	12
TGME49_257370	hypothetical protein	121.933	Down	null	0
TGME49_257568	hypothetical protein	49.995	Up	HMM: MLSVGASAWTLSLQSHAWSV, NN: MLSVGASAWTLSLQSHAWSV	0
TGME49_257572	hypothetical protein	35.41	Up	null	2
TGME49_257625	tetrahydrofolate dehydrogenase/cyclohydrolase, NAD(P)-binding domain-containing protein	88.902	Up	null	0
TGME49_257670	hypothetical protein	305.792	Down	null	0
TGME49_257685	hypothetical protein	14.778	Down	null	0
TGME49_257700	hypothetical protein	111.064	Up	null	0
TGME49_257720	proton ATPase, putative	250.491	Up	null	9
TGME49_257755	hypothetical protein	17.97	Down	null	0
TGME49_257790	histone deacetylase HDAC4	98.236	Up	HMM: MGHPPPWTASPLFFLLLFWHAPPSLVSS, NN: MGHPPPWTASPLFFLLLFWHAPPSLVSS	0
TGME49_257945	3'5'-cyclic nucleotide phosphodiesterase domain-containing protein	254.059	Up	null	6
TGME49_258225	hypothetical protein	12.579	Down	HMM: MWLWFPCCQFIHVAAQ, NN: MWLWFPCCQFIHVAAQ	0
TGME49_258680	TATA-box binding protein TBP2	57.932	Down	null	0
TGME49_258700	transporter, major facilitator family protein	83.125	Down	null	11
TGME49_258880	axonemal dynein light chain p33, putative	33.781	Down	null	0
TGME49_258900	hypothetical protein	63.295	Down	null	0
TGME49_259130	4-hydroxybenzoate polyprenyl transferase	74.816	Up	null	5
TGME49_259150	hypothetical protein	176.196	Up	HMM: MCMRSSDILRKRPSLAHACVSLVVFSARLTLSA, NN: MCMRSSDILRKRPSLAHACVSLVVFSARLTLSASE	0
TGME49_259155	hypothetical protein	132.997	Up	null	0
TGME49_259205	hypothetical protein	38.795	Up	null	0
TGME49_259970	hypothetical protein	63.974	Down	null	0
TGME49_260150	tetratricopeptide repeat-containing protein	352.886	Up	null	0
TGME49_260340	DNL zinc finger protein	27.045	Down	HMM: MAAVQLLPSSLRRIGLTVLSPSSCATSLAH, NN: MAAVQLLPSSLRRIGLTVLSPSSCAT	0
TGME49_260460	oxidoreductase, putative	37.178	Down	null	0
TGME49_260480	leucine rich repeat-containing protein	148.114	Up	null	0
TGME49_260550	acetyltransferase, GNAT family protein	81.679	Down	null	0
TGME49_260620	hypothetical protein	11.495	Down	HMM: MDEFSGCICQFLSTLIGGVRSA, NN: MDEFSGCICQFLSTLIGGVRSA	1
TGME49_260840	hypothetical protein	161.936	Up	null	0
TGME49_261610	hypothetical protein	153.51	Up	null	0
TGME49_261730	hypothetical protein	210.536	Down	null	0
TGME49_262030	ALG6, ALG8 glycosyltransferase family protein	175.236	Up	null	9
TGME49_262480	dynein light chain roadblock-type 2, putative	13.91	Down	null	0
TGME49_262500	hypothetical protein	19.537	Down	null	0
TGME49_262540	protein kinase, putative	85.169	Up	null	0
TGME49_262715	hypothetical protein	15.806	Down	null	0
TGME49_262740	hypothetical protein	77.877	Down	null	0
TGME49_262900	hypothetical protein	237.464	Up	null	0
TGME49_262970	hypothetical protein	91.065	Down	null	0
TGME49_263327	hypothetical protein	10.601	Up	null	1
TGME49_263330	Adaptin ear-binding coat-associated protein 2 (NECAP-2) isoform 2 family protein	32.9	Up	null	0
TGME49_263380	Dullard family phosphatase domain-containing protein	26.704	Up	null	0
TGME49_263410	scavenger receptor cysteine-rich domain-containing protein	134.501	Down	HMM: MGYRVVASLVGGLFLANSIGSVSAT, NN: MGYRVVASLVGGLFLANSIGSVSAT	0
TGME49_263490	ubiquitin conjugating enzyme E2, putative	18.403	Down	null	0
TGME49_263670	ribosomal RNA large subunit methyltransferase FTSJ1, putative	43.852	Down	null	0
TGME49_264250	hypothetical protein	15.392	Up	null	0
TGME49_264670	DNA polymerase family B protein	457.324	Up	null	0
TGME49_264790	hypothetical protein	477.998	Up	null	0
TGME49_264840	ATP-dependent DNA helicase, RecQ family protein	190.519	Down	null	0
TGME49_264940	kelch repeat-containing protein	214.243	Up	null	0
TGME49_264990	hypothetical protein	29.068	Down	null	0
TGME49_265030	hypothetical protein	49.984	Up	HMM: MFPLMDIMCLLHGYMHFLHFSLLLFTDAVHAA, NN: MFPLMDIMCLLHGYMHFLHFSLLLFTDAVHAA	0
TGME49_265080	Tubulin-tyrosine ligase family protein	202.023	Down	null	0
TGME49_265100	hypothetical protein	15.424	Up	null	0
TGME49_265420	hypothetical protein	28.687	Down	null	0
TGME49_266110	DEAD/DEAH box helicase domain-containing protein	95.219	Down	HMM: MATRLSALLTPGGRAV, NN: MATRLSALLTPGGRAV	0
TGME49_266270	short-chain-acyl-CoA dehydrogenase	57.257	Up	HMM: MRSAALHLPKRFVRSGFSAAPVGKALAV, NN: MRSAALHLPKRFVRSGFSAAPVGKALAV	0
TGME49_266372	hypothetical protein	102.304	Up	null	0
TGME49_266380	hypothetical protein	109.322	Down	null	0
TGME49_266680	hypothetical protein	64.507	Up	null	0
TGME49_266690	hypothetical protein	183.181	Down	null	0
TGME49_266860	BTB/POZ domain-containing protein	40.667	Down	null	0
TGME49_267030	ribonuclease type III Dicer	491.971	Up	null	0
TGME49_267045	Ras family protein	21.85	Up	null	0
TGME49_267160	SAG-related sequence SRS38D	41.443	Down	HMM: MAYTIMVGEVSVAKARSSTTPCSLARVVKVRLSSASRLGCVTLLLLASATGL, NN: MAYTIMVGEVSVAKARSSTTPCSLARVVKVRLSSASRLGCVTLLLLASATGL	0
TGME49_267460	AP2 domain transcription factor AP2IX-1	107.895	Up	null	0
TGME49_267630	hypothetical protein	17.288	Down	HMM: MELSCLMSAWVFAPASPS, NN: MELSCLMSAWVFAPASPS	0
TGME49_267642	hypothetical protein	43.872	Down	null	0
TGME49_267820	electron transfer flavoprotein subunit beta, putative	29.987	Up	null	0
TGME49_267855	hypothetical protein	391.871	Up	HMM: MANPTKNSSLSSSASSSLSSSASSSLSSSASSSLSSSASSSPSSSSSPSSSASSSLSSSASSAS, NN: MANPTKNSSLSSSASSSLSSSASSSLSSSASSS	2
TGME49_267960	hypothetical protein	27.837	Up	null	0
TGME49_267980	hypothetical protein	40.508	Down	null	1
TGME49_268020	transporter, major facilitator family protein	303.224	Up	null	6
TGME49_268182	hypothetical protein	79.713	Down	null	7
TGME49_268210	AGC kinase	58	Up	null	0
TGME49_268220	hypothetical protein	195.709	Up	HMM: MRLPPCFSLSSGSSCSPSSRSS, NN: MRLPPCFSLSSGSSCSPSSRSS	0
TGME49_268240	hypothetical protein	240.579	Down	HMM: MAAASRLSVPPSLFSSALAEASSFAS, NN: MAAASRLSVPPSLFSSALAE	0
TGME49_268360	hypothetical protein	52.573	Up	null	0
TGME49_268670	hypothetical protein	24.142	Down	null	5
TGME49_268700	hypothetical protein	32.986	Down	HMM: MRFTAILILSVSFMAYGRSQ, NN: MRFTAILILSVSFMAYGRSQ	0
TGME49_268930	hypothetical protein	60.855	Down	HMM: MVDFIRNHTYDLHWPPPLLRGKTLRVAVSLLFVLHNVSAN, NN: MVDFIRNHTYDLHWPPPLLRGKTLRVAVSLLFVLHNVSAN	0
TGME49_269015	hypothetical protein	10.733	Up	HMM: MFNRLVCTLLPFLKLLGK, NN: MFNRLVCTLLPFLKLLGKQSTRTE	0
TGME49_269075	hypothetical protein	519.07	Up	null	0
TGME49_269175	hypothetical protein	47.996	Down	null	0
TGME49_269350	hypothetical protein	254.319	Up	null	0
TGME49_269438	hypothetical protein	7.89	Down	null	0
TGME49_269670	hypothetical protein	235.8	Up	null	0
TGME49_269730	myosin-light-chain kinase	193.357	Down	null	0
TGME49_269750	CrcB family protein	76.784	Up	HMM: MPKKAEKAVAPLGAELLLIAAFSAFGT, NN: MPKKAEKAVAPLGAELLLIAAFSAFGT	8
TGME49_269780	ADP-ribosylation factor, putative	24.52	Up	null	0
TGME49_269930	calcium binding egf domain-containing protein	337.847	Up	null	4
TGME49_270020	hypothetical protein	26.978	Down	null	0
TGME49_270160	hypothetical protein	47.432	Up	HMM: MALPTSLSASVQWTARTPQRRKRVRRSCFCCVFLLLFNNAFGT, NN: MALPTSLSASVQWTARTPQRRKRVRRSCFCCVFLLLFNNAFGT	1
TGME49_270300	hypothetical protein	57.926	Down	null	0
TGME49_270450	MCM2/3/5 family protein	146.253	Up	null	0
TGME49_270610	hypothetical protein	50.069	Down	null	0
TGME49_270760	asparagine synthase	184.595	Up	HMM: MSASFVVSLRAHGSRSQ, NN: MSASFVVSLRAHGSRSQ	0
TGME49_270890	hypothetical protein	59.883	Down	null	0
TGME49_271000	hypothetical protein	155.321	Down	null	0
TGME49_271625	serine--tRNA ligase	101.985	Down	HMM: MVRLRVCFALLSFSCCLLLPRQILCS, NN: MVRLRVCFALLSFSCCLLLPRQILCS	0
TGME49_271770	hypothetical protein	251.894	Up	null	0
TGME49_271800	serine esterase (DUF676) protein	87.532	Down	null	0
TGME49_271860	tRNA (Uracil-5-)-methyltransferase	74.38	Up	HMM: MSPRSSPKHGRSCHSDGTWRLVIIIIYSLVLNVLSSCSAF, NN: MSPRSSPKHGRSCHSDGTWRLVIIIIYSLVLNVLSSCSAF	1
TGME49_272180	3-oxo-5-alpha-steroid 4-dehydrogenase	57.21	Down	HMM: MNSLPSALAFGVILSLAIPVVSVACLDPLLLSPFFLFCLSWTAVLCFLAAAVLAVLSL, NN: MNSLPSALAFGVILSLAIPVVSVA	6
TGME49_272200	AGC kinase	85.599	Up	null	0
TGME49_272410	phosphogluconate dehydrogenase (decarboxylating), NAD binding domain-containing protein	41.718	Up	HMM: MAATHLSSSFGSVGKGVQGVLPFLFPTFLPPACGD, NN: MAATHLSSSFGSVGKGVQGVLPFLFPTFLPPACGD	0
TGME49_272530	hypothetical protein	72.361	Down	null	0
TGME49_272570	dihydrouridine synthase (dus) protein	101.609	Up	null	0
TGME49_272590	hypothetical protein	110.934	Up	null	0
TGME49_272730	hypothetical protein	110.322	Up	null	0
TGME49_273140	radical SAM methylthiotransferase, MiaB/RimO family protein	93.373	Up	HMM: MSESPASSLTASGGEGVAVAGGAALVCSSAAALSSRGSWRSSAFLPALALTGVGCA, NN: MSESPASSLTASGGEGVAVAGGAALVCSSAAAL	2
TGME49_274030	hypothetical protein	12.189	Up	null	0
TGME49_274040	hypothetical protein	191.284	Up	null	0
TGME49_274110	glycoprotease family protein	181.68	Up	HMM: MVSGIRRPVYRCRTSPTCLVLLISLLRLVPSSLAD, NN: MVSGIRRPVYRCRTSPTCLVLLISLLRLVPSSLAD	0
TGME49_274290	Toxoplasma gondii family B protein	14.843	Up	null	1
TGME49_275590	mono- or diacylglycerol acyltransferase	34.542	Down	HMM: MSGTLERVSLFALQMFILGSFFHVPLLAYAV, NN: MSGTLERVSLFALQMFILGSFFHVPLLAYAV	2
TGME49_275640	hypothetical protein	46.319	Down	HMM: MEAAQSSVFQQCHRGGENRTHTCVLVAAFALLAHCVLSD, NN: MEAAQSSVFQQCHRGGENRTHTCVLVAAFALLAHCVLSD	1
TGME49_275660	hypothetical protein	50.855	Up	HMM: MKGSSASSLLHIARRLPGALILVGMSIVLGI, NN: MKGSSASSLLHIARRLPGALILVGMSIVLGI	1
TGME49_275870	tubulin/FtsZ family, GTPase domain-containing protein	33.621	Down	null	1
TGME49_276155	hypothetical protein	98.04	Up	null	0
TGME49_276200	hypothetical protein	448.603	Up	null	0
TGME49_276230	Toxoplasma gondii family B protein	17.499	Up	HMM: MVNLFSVVLTIVLLIVVSGTLSY, NN: MVNLFSVVLTIVLLIVVSGTLSY	2
TGME49_276960	tetratricopeptide repeat-containing protein	197.038	Up	null	0
TGME49_277055	hypothetical protein	14.882	Down	null	0
TGME49_277860	hypothetical protein	52.514	Up	null	0
TGME49_277930	hypothetical protein	197.037	Up	null	0
TGME49_278240	Zn-finger in Ran binding protein and others domain-containing protein	125.557	Up	null	0
TGME49_278245	hypothetical protein	11.473	Up	null	0
TGME49_278260	polynucleotide adenylyltransferase	267.785	Up	null	0
TGME49_278550	elongation factor Tu GTP binding domain-containing protein	275.061	Up	null	0
TGME49_278760	hypothetical protein	125.631	Up	null	0
TGME49_278840	hypothetical protein	83.132	Up	null	0
TGME49_279440	PA14 domain-containing protein	96.068	Down	HMM: MVKFYATAVAACFGLVGTSAQ, NN: MVKFYATAVAACFGLVGTSAQ	0
TGME49_279540	hypothetical protein	13.66	Up	null	0
TGME49_279550	hypothetical protein	25.189	Up	null	3
TGME49_280370	hypothetical protein	71.865	Down	null	0
TGME49_280580	SAG-related sequence SRS35B	19.363	Up	HMM: MASGRRPLSAVSGFCRSIAVVLLLSVTQRTYLS, NN: MASGRRPLSAVSGFCRSIAVVLLLSVTQRTYLS	0
TGME49_280680	hypothetical protein	25.61	Up	null	0
TGME49_281030	hypothetical protein	16.789	Up	null	0
TGME49_281500	hypothetical protein	87.66	Up	null	0
TGME49_281510	ribonuclease H1 large subunit, putative	40.785	Up	null	0
TGME49_281590	hypothetical protein	16.444	Down	HMM: MQTHLLPRSHLRDLLSDPFIAKMKFLTNILLVLSCVLVLAGTVQGQ, NN: MQTHLLPRSHLRDLLSDPFIAKMKFLTNILLVLSCVLVLAGTVQGQ	2
TGME49_281600	hypothetical protein	25.35	Up	HMM: MLCFYSRNVWRCFVNLLTLSSTSYLVTAC, NN: MLCFYSRNVWRCFVNLLTLSSTSYLVTAC	0
TGME49_282070	hypothetical protein	124.835	Down	null	0
TGME49_283500	tetratricopeptide repeat-containing protein	71.489	Up	null	0
TGME49_283840	GATA zinc finger domain-containing protein	215.981	Up	null	0
TGME49_283860	leucine rich repeat-containing protein	71.949	Up	null	0
TGME49_284170	DHHC zinc finger domain-containing protein	104.86	Up	null	3
TGME49_284620	hypothetical protein	254	Up	HMM: MSRRVERLRRGEGLLSFGVVHDSLAV, NN: MSRRVERLRRGEGLLSFGVVHDSLAV	0
TGME49_285410	calmodulin-binding carboxy-terminal kinesin-like family protein, putative	86.334	Up	null	0
TGME49_285445	hypothetical protein	266.5	Up	null	0
TGME49_285810	MYND finger domain-containing protein	133.78	Down	null	0
TGME49_286060	tricarboxylate carrier protein	38.089	Up	null	2
TGME49_286460	hypothetical protein	15.567	Down	null	0
TGME49_286540	hypothetical protein	49.896	Down	HMM: MLCLTVFSASLAIMASRAFAA, NN: MLCLTVFSASLAIMASRAFAA	0
TGME49_286670	hypothetical protein	67.685	Up	null	0
TGME49_286932	ATPase family associated with various cellular activities (AAA) domain-containing protein	467.4	Up	null	0
TGME49_287470	hypothetical protein	41.592	Up	null	0
TGME49_288190	hypothetical protein	536.362	Up	null	0
TGME49_288390	B3GNTL1 protein	82.837	Down	null	0
TGME49_288475	hypothetical protein	219.317	Up	null	0
TGME49_288560	hypothetical protein	83.89	Up	HMM: MWNRASVHTWKREVVASLHPLAWQHAPVNVACSPRVADKHACVLFFALSRVCAS, NN: MWNRASVHTWKREVVASL	0
TGME49_288700	RecF/RecN/SMC N terminal domain-containing protein	183.128	Up	HMM: MRKMKRTRTIALAATQALLSESR, NN: MRKMKRTRTIALAATQALLSESR	0
TGME49_288930	hypothetical protein	126.143	Up	null	0
TGME49_288940	hypothetical protein	647.211	Up	null	5
TGME49_288950	AP2 domain transcription factor AP2IX-4	103.788	Down	null	0
TGME49_289277	hypothetical protein	21.445	Up	null	3
TGME49_289280	hypothetical protein	107.054	Up	null	0
TGME49_289310	cullin family protein	103.663	Up	HMM: MTATRACYLPSSSSSSSSSSSSSSSSSSSSSFASAE, NN: MTATRAC	0
TGME49_289610	hypothetical protein	21.296	Down	null	1
TGME49_289850	hypothetical protein	91.402	Up	null	0
TGME49_289900	n-acetyltransferase family protein	18.996	Down	null	0
TGME49_289910	hypothetical protein	64.531	Down	null	0
TGME49_290000	hypothetical protein	19.445	Down	HMM: MAFTSPSSSRAAFLLLVSLSTFAS, NN: MAFTSPSSSRAAFLLLVSLSTFAS	0
TGME49_290605	hypothetical protein	61.728	Up	null	0
TGME49_290645	hypothetical protein	25.185	Down	null	0
TGME49_290710	hypothetical protein	10.87	Up	null	0
TGME49_290740	hypothetical protein	17.046	Up	HMM: MFWLERSEGRISASFCPLVAVSAFLQGPRCA, NN: MFWLERSEGRISASFCPLVAVSAFLQGPRCA	1
TGME49_291070	hypothetical protein	31.095	Up	null	0
TGME49_291075	hypothetical protein	148.807	Up	null	0
TGME49_291170	hypothetical protein	59.299	Up	null	0
TGME49_291340	hypothetical protein	154.921	Up	null	0
TGME49_291810	thioredoxin domain-containing protein	24.931	Up	null	0
TGME49_292100	2-oxoisovalerate dehydrogenase subunit alpha, putative	56.292	Down	HMM: MASSACRVRLVTCGLIRTSISCEAG, NN: MASSACRVRLVTCGLIRTSISC	0
TGME49_292290	hypothetical protein	18.054	Up	HMM: MPSLLSFRSCSQPRPSFLSYVTAPSAVLLAALRFSLPWLPSLAVTS, NN: MPSLLSFRSCSQPRPSFLSYVTAPSAVLLAALRFSLPWLPSLAV	0
TGME49_292335	hypothetical protein	18.195	Down	null	0
TGME49_293030	hypothetical protein	244.528	Up	null	0
TGME49_293240	triacylglycerol lipase	118.61	Down	null	0
TGME49_293330	hypothetical protein	163.357	Down	null	0
TGME49_293420	transporter, major facilitator family protein	61.951	Down	null	12
TGME49_293760	EF hand domain-containing protein	58.15	Down	HMM: MKATPSLSRFLFPGFLLFSSSFFVSPFTHVAFSS, NN: MKATPSLSRFLFPGFLLFSSSFFVSPF	0
TGME49_293780	hypothetical protein	35.99	Up	null	0
TGME49_293840	hypothetical protein	246.623	Up	null	0
TGME49_294370	hypothetical protein	17.58	Down	null	2
TGME49_294585	hypothetical protein	85.653	Up	null	0
TGME49_294610	histone lysine methyltransferase, SET, putative	189.753	Down	null	0
TGME49_294785	zinc finger (CCCH type) motif-containing protein	38.418	Down	null	0
TGME49_294870	universal stress family protein	46.012	Down	null	0
TGME49_295468	C2 domain-containing protein	116.402	Up	HMM: MTAFILMTAMSGRAAGG, NN: MTAFILMTAMSGRAAGG	0
TGME49_295658	zinc finger in N-recognin protein	480.926	Up	null	0
TGME49_295720	sulfite oxidase, putative	92.611	Up	null	0
TGME49_295740	hypothetical protein	202.636	Up	null	0
TGME49_295750	IgA-specific serine endopeptidase	37.636	Up	HMM: MQLMLCLCCGFARGELAE, NN: MQLMLCLCCGFARGELAE	0
TGME49_296015	hypothetical protein	10.704	Down	null	0
TGME49_296340	hypothetical protein	22.16	Up	null	0
TGME49_297340	hypothetical protein	126.265	Up	null	0
TGME49_297480	hypothetical protein	49.31	Down	null	0
TGME49_297770	hypothetical protein	64.728	Down	null	0
TGME49_297925	HesB-like domain-containing protein	62.352	Down	null	0
TGME49_297980	hypothetical protein	14.007	Down	null	1
TGME49_298820	hypothetical protein	19.083	Up	null	1
TGME49_298960	Toxoplasma gondii family C protein	29.226	Up	null	1
TGME49_298980	RNA pseudouridine synthase superfamily protein	97.466	Down	null	0
TGME49_299150	AP2 domain transcription factor AP2III-3	250.4	Up	null	0
TGME49_299160	hypothetical protein	15.086	Up	null	0
TGME49_299570	Toxoplasma gondii family B protein	15.587	Down	HMM: MIVNTCSATMLALFIEFLCALSNGS, NN: MIVNTCSATMLALFIEFLCAL	1
TGME49_300300	hypothetical protein	21.952	Down	null	0
TGME49_300320	dimethyladenosine transferase	100.746	Up	HMM: MVRALRFPSFLRSRSLAARLRASLLYLCLHFLLLQHAALSSGA, NN: MVRALRFPSFLRSRSLAARLRASLLYLCLHFLLLQHAALSSGA	0
TGME49_301460	hypothetical protein	77.326	Up	HMM: MTSRLPFFYLASCGRGRTPCFCLFFSPDSETPHFLLFSLFLLSRSLSL, NN: MTSRLPFFYLASCGRGR	0
TGME49_304630	ATG C terminal domain-containing protein	874.798	Down	null	0
TGME49_304690	hypothetical protein	17.125	Down	null	2
TGME49_304870	hypothetical protein	19.381	Down	null	0
TGME49_304920	hypothetical protein	24.214	Up	HMM: MGKPTVLMFLILSVIFVETKGE, NN: MGKPTVLMFLILSVIFVETKGE	0
TGME49_305455	hypothetical protein	19.442	Down	null	0
TGME49_305750	nucleolar gtp-binding protein 2, putative	71.048	Up	null	0
TGME49_305760	hypothetical protein	37.268	Up	null	0
TGME49_305950	tetratricopeptide repeat-containing protein	102.28	Up	null	0
TGME49_306300	hypothetical protein	317.662	Up	null	0
TGME49_306338	dynein gamma chain, flagellar outer arm, putative	518.419	Up	null	0
TGME49_306490	hypothetical protein	120.759	Down	null	0
TGME49_306688	hypothetical protein	19.912	Up	null	0
TGME49_306860	hypothetical protein	14.223	Up	null	0
TGME49_306920	hypothetical protein	49.764	Down	null	0
TGME49_307015	hypothetical protein	12.552	Down	null	0
TGME49_307020	hypothetical protein	30.818	Down	null	0
TGME49_308990	transporter, solute:sodium symporter (SSS) family protein	65.275	Up	null	13
TGME49_309352	SAG-related sequence SRS55N	44.317	Up	HMM: MEGTALRGFQVSKSLQTAVVVSIFVGLAFLSNGAASSDAA, NN: MEGTALRGFQVSKSLQTAVVVSIFVGLAFLSNGAAS	0
TGME49_310220	hypothetical protein	149.82	Down	HMM: MHPPVSARPVSRAPELFASALGPAQRVESS, NN: MHPPVSARPVSRAPELFASALGPAQRVESS	0
TGME49_310230	hypothetical protein	23.17	Down	HMM: MKLQNSVFFCPLGAGILLVCPCFSS, NN: MKLQNSVFFCPLGAGILLVCPCFSSPVANAQ	1
TGME49_310235	hypothetical protein	31.556	Down	null	1
TGME49_310910	WD domain, G-beta repeat-containing protein	339.022	Up	null	0
TGME49_311080	transporter, cation channel family protein	161.397	Up	HMM: MALNNGSLSSSLASPPPFASSA, NN: MALNNGSLSSSLASPPPFASSA	10
TGME49_311140	hypothetical protein	195.191	Down	null	0
TGME49_311250	hypothetical protein	201.435	Up	null	0
TGME49_311370	methylmalonate-semialdehyde dehydrogenase [acylating], putative	63.226	Up	null	0
TGME49_311450	zinc finger, c2h2 type domain-containing protein	52.419	Down	null	0
TGME49_311485	hypothetical protein	22.357	Up	null	0
TGME49_311490	hypothetical protein	140.496	Up	null	0
TGME49_311650	leucine rich repeat-containing protein	184.41	Up	null	0
TGME49_311730	hypothetical protein	167.743	Up	null	0
TGME49_311810	hypothetical protein	85.877	Up	null	0
TGME49_312330	hypothetical protein	208.244	Up	null	1
TGME49_312360	hypothetical protein	128.696	Up	null	0
TGME49_312450	hypothetical protein	28.302	Up	null	0
TGME49_312680	60S ribosomal protein L27, putative	10.704	Down	null	0
TGME49_312970	hypothetical protein	109.907	Up	null	0
TGME49_313040	hypothetical protein	40.048	Up	null	0
TGME49_313120	DNA-directed RNA polymerase, alpha subunit	122.242	Up	HMM: MAVGKRLTRPVRFLSHRLLLAVLSLALSPFVSSI, NN: MAVGKRLTRPVRFLSHRLLLAVLSLALSPFVSSI	1
TGME49_313210	hypothetical protein	334.051	Up	null	0
TGME49_313220	hypothetical protein	156.292	Up	null	0
TGME49_313250	hypothetical protein	11.069	Down	null	0
TGME49_313510	hypothetical protein	18.327	Up	null	0
TGME49_313630	hypothetical protein	1451.67	Up	HMM: MLTSLLLSRLNAALSS, NN: MLTSLLLSRLNAALSS	2
TGME49_313660	hypothetical protein	75.65	Up	null	3
TGME49_313677	hypothetical protein	11.504	Down	null	0
TGME49_313780	hypothetical protein	47.246	Down	null	0
TGME49_313852	hypothetical protein	174.435	Up	null	0
TGME49_314055	splicing factor, putative	74.739	Down	null	0
TGME49_314250	bradyzoite rhoptry protein BRP1	17.912	Down	HMM: MERASAAAATRSPIFASALTKRKPLLLLLGFAVVLTFFTCGV, NN: MERASAAAATRSPIFASALTKRKPLLLLLGFAVVLTF	1
TGME49_314320	hypothetical protein	141.876	Up	HMM: MCVSGLIHRRGFVFQGVSFLALLFLLFSRLLLQTPVTAS, NN: MCVSGLIHRRGFVFQGVSFLALLFLLFSRLLLQTPVTAS	1
TGME49_314370	hypothetical protein	93.577	Down	null	0
TGME49_314485	hypothetical protein	25.285	Up	null	0
TGME49_314570	hypothetical protein	21.706	Up	null	1
TGME49_314760	hypothetical protein	18.246	Up	null	0
TGME49_314770	tRNA (guanine-N1)-methyltransferase	34.083	Down	null	0
TGME49_315100	hypothetical protein	150.925	Down	null	0
TGME49_315640	lipoyl(octanoyl) transferase	101.044	Up	null	1
TGME49_315660	hypothetical protein	91.18	Up	null	0
TGME49_315802	hypothetical protein	60.114	Up	null	0
TGME49_315830	hypothetical protein	88.615	Up	null	0
TGME49_315845	kinesin motor domain-containing protein	63.834	Up	null	0
TGME49_315958	radical SAM domain-containing protein	100.629	Up	HMM: MCIRCQGMPAATQSLHVLFFSLFLYSICQ, NN: MCIRCQGMPAATQSLHVLFFSLFLYSICQ	0
TGME49_316090	RNAse P Rpr2/Rpp21 subunit domain-containing protein	68.857	Up	HMM: MASLLQIAAALRGQDSA, NN: MASLLQIAAALRGQDSA	0
TGME49_316370	hypothetical protein	88.005	Up	null	0
TGME49_316700	uridine kinase	65.066	Up	null	0
TGME49_316780	hypothetical protein	114.34	Down	null	0
TGME49_318220	hypothetical protein	73.842	Down	null	0
TGME49_318300	hypothetical protein	29.167	Up	HMM: MSEPPASLHRKISSTQSPPASTLILLLLPRFLSPCARRAA, NN: MSEPPASLHRKISSTQSPPASTLILLLLPRFLSPCA	0
TGME49_318470	AP2 domain transcription factor AP2IV-4	250.125	Down	null	0
TGME49_318650	transhydrogenase	108.301	Down	HMM: MRGFVYLFSAICFILSLRGLST, NN: MRGFVYLFSAICFILSLRGL	11
TGME49_319380	hypothetical protein	283.824	Up	null	0
TGME49_319500	hypothetical protein	111.764	Down	null	12
TGME49_319590	hypothetical protein	282.851	Up	null	0
TGME49_319600	alpha-tubulin N-acetyltransferase, putative	98.565	Down	null	0
TGME49_319662	histone lysine methyltransferase, SET, putative	99.061	Up	HMM: MWRRRDPMALRNALRLSFFLLVLLFPSQVVAS, NN: MWRRRDPMALRNALRLSFFLLVLLFPSQVVAS	1
TGME49_319890	hypothetical protein	25.534	Down	HMM: MKGFIKILLLLGLLAVTTRTVAQ, NN: MKGFIKILLLLGLLAVTTRTVAQ	0
TGME49_320040	CHORD protein	22.079	Up	null	0
TGME49_320105	hypothetical protein	16.529	Up	null	0
TGME49_320150	elongation factor Tu GTP binding domain-containing protein	99.804	Up	HMM: MVSCRDRVLLFLLHLWSFAGRPISFSL, NN: MVSCRDRVLLFLLHLWSFAGRPISF	0
TGME49_320470	hypothetical protein	26.992	Down	null	4
TGME49_320550	hypothetical protein	274.4	Up	null	0
TGME49_320610	hypothetical protein	83.817	Down	null	0
TGME49_321430	hypothetical protein	52.164	Up	null	0
TGME49_321600	hypothetical protein	126.558	Down	null	0
TGME49_321610	hypothetical protein	79.488	Up	null	0
TGME49_324800	tryptophanyl-tRNA synthetase	15.909	Down	null	0
TGME49_325800	EGF family domain-containing protein	28.32	Down	HMM: MRGGTSALLHALTFSGAVWMCTPAEAL, NN: MRGGTSALLHALTFSGAVWMCTPAEAL	0
TGME49_326800	S-Adenosyl homocysteine hydrolase	36.29	Up	HMM: DALLRSSVSWLSRRDARRSPWWCTVMALTWGEGA, NN: DALLRSSVSWLSRRDARRSPWWCTVMALTWGEGAGP	0
TGME49_328900	hypothetical protein	75.06	Up	null	0
TGME49_329300	hypothetical protein	68.53	Up	null	0
TGME49_329500	hypothetical protein	36.508	Up	null	0
TGME49_329600	hypothetical protein	11.659	Up	null	0
